# Supplementary material for: Organophosphate Esters in China: Fate, Occurrence, and Human Exposure
Source: MDPI journal article supplement (doi:10.3390/toxics9110310), 2021-11-16
Supplement: s1 [file s1]

# Supplementary Materials: Organophosphate Esters in China: Fate, Occurrence, and Human Exposure

Zhihui Hu, Lingshi Yin, Xiaofeng Wen, Changbo Jiang, Yuannan Long, Jiawei Zhang and Ruyi Liu

**Table S1.** Comparison of concentrations (range; arithmetic mean/median; Detection ratio% ng/L) of the total organophosphate esters (OPEs) and the predominant chloroalkyl phosphates in water from various water environments in China.

| Location            | Description of matrix<br>(sample year)                             | ΣOPEs (the total number)             | TCEP                                | TCIPP                            | TDCPP                               | Reference |
|---------------------|--------------------------------------------------------------------|--------------------------------------|-------------------------------------|----------------------------------|-------------------------------------|-----------|
| River water         |                                                                    |                                      |                                     |                                  |                                     |           |
| Shanghai (28)       | Urban area (Jun 2018)                                              | 339-1689;<br>850/-<br>(8)            | 67.5-865.2;<br>348.5/340.1;<br>100% | 123.9-523;<br>259/250.3;<br>100% | <11.53-45.3;<br>25.1/24.8;<br>96.4% | [1]       |
| Shanghai (28)       | Rural area;<br>Chongming Island (Jun 2018)                         | 185-321;<br>222/-<br>(8)             | 30-63.3;<br>38.2/36.4<br>100%       | 60-154.2;<br>77.4/70;<br>100%    | <11.53;<br><11.53/<11.53;<br>0%     |           |
| Beijing (340)       | Urban surface water including the river and lake water (2013-2014) | 3.24-10945;<br>954/569;<br>(14)      | <LOD-5698;<br>219/104;<br>95.8%     | <LOD-1742;<br>291/174;<br>99.4%  | <LOD-3617;<br>116/22.8;<br>90.2%    | [2]       |
| Chengdu             | Jinjiang                                                           | 689.09-10623.94;<br>3747.58/-<br>(7) | 27.68-273.10<br>;-/-;<br>100%       | 35.76-143.75;<br>-/-;<br>100%    | nd                                  | [3]       |
| Guangzhou           | Pearl river                                                        | 55-577;<br>235.86/183.5;<br>(7)      | 3.54-75.4;<br>27.78/19.2;<br>-      | 2.47-62.6;<br>23.37/15.25;<br>-  | 1.82-73.6;<br>19.13/6.94;<br>-      | [4]       |
|                     | Dongjiang river                                                    | 24-293;<br>136.04/110.5;<br>(7)      | 1.47-16.2;<br>7.37/6.81;<br>-       | 3.96-12.9;<br>8.43/8.75;<br>-    | 1.54-6.68;<br>3.81/3.97;<br>-       |           |
| Yangtze River Basin | Mainstream                                                         | 66.5-112;<br>83.4/79.7;<br>100% (13) | <LOD-22.5;<br>17.8/17.6;<br>93.8%   | 12.6-44.6;<br>25.2/25.3;<br>100% | <LOD;<br><LOD/<LOD;<br>0            | [5]       |
|                     | Inflowing rivers                                                   | 55.6-5071;<br>357/176;<br>100% (13)  | 11.0-1202;<br>79.9/39.1;<br>100%    | 14.0-450;<br>91.5/67.7;<br>100%  | <LOD-288;<br>39.5/11.5;<br>15.9%    |           |
| Yi River (1)        | Inflowing river (Nov 2016)                                         | 97.1<br>(12)                         | -;<br>36.1/-;<br>-                  | -;<br>2.79/-<br>-                | -;<br>0.40/-;<br>-                  | [5]       |
| Fangting river (1)  | Inflowing river (Nov 2016)                                         | 1066<br>(12)                         | -;<br>794/-;<br>-                   | -;<br>3.59/-;<br>-               | -;<br>0.78/-;<br>-                  |           |
| Lake water          |                                                                    |                                      |                                     |                                  |                                     |           |
| Luoma Lake (14)     | Include the estuary and                                            | 0.82-708;<br>127/73.2;<br>(12)       | 0.01-552;<br>69.9/24.3;<br>100%     | 0.02-10.8;<br>6.29/5.79;<br>100% | 0.03-1.98;<br>0.95/1.03;<br>100%    | [6]       |

|                                                   |                                                             |                                                                               |                                 |                                            |                               |      |
|---------------------------------------------------|-------------------------------------------------------------|-------------------------------------------------------------------------------|---------------------------------|--------------------------------------------|-------------------------------|------|
|                                                   | lake outlet<br>(Nov 2016)                                   |                                                                               |                                 |                                            |                               |      |
| Taihu<br>Lake<br>(25)                             | Taihu Lake<br>and its<br>tributaries(Nov<br>2016)           | 1.0×10 <sup>2</sup> -1.7×10 <sup>3</sup> ;<br>8.0×10 <sup>2</sup> /-;<br>(12) | 14-76;<br>44/47;<br>100%        | 12-2.9×10 <sup>2</sup> ;<br>93/63;<br>100% | Nd-6.0;<br>1.8/1.4;<br>92%    | [7]  |
| Taihu<br>Lake (29)                                | (Jun 2016)                                                  | 166-1530;<br>-/<br>(11)                                                       | 31.6-1870;<br>1.12/-;<br>96%    | 59.7-12300;<br>449/-;<br>88%               | 9.74-682;<br>0.385/-;<br>92%  | [8]  |
| Marine water                                      |                                                             |                                                                               |                                 |                                            |                               |      |
| Dalian (14)                                       | Bohai Sea and<br>Yellow Sea<br>urban district<br>(Sep 2017) | 21.6-61.5;<br>39.7/-;<br>(9)                                                  | 2.2-17.5;<br>8.74/7.93;<br>-    | 11-26.3;<br>19.15/21.2;<br>-               | 0.61-6.91;<br>2.63/1.82;<br>- | [9]  |
| Beibu Gulf                                        | Culture<br>ponds;                                           | 47.1-227;<br>122/116;<br>(11)                                                 | -                               | -                                          | -                             | [10] |
|                                                   | Estuaries;<br>nearshore<br>areas                            | 32.9-71.3;<br>51.1/50.0;<br>(11)                                              | -                               | -                                          | -                             |      |
| Bohai Sea                                         |                                                             | 20.85-56.59;<br>36.04/36.39;<br>(7)                                           | 6.67-16.19;<br>9.81/10.17;<br>- | 4.76-17.4;<br>11.36/11.46;<br>-            | 1.58-4.78;<br>3.02/2.87;<br>- | [11] |
| Yellow Sea                                        | Surface and<br>bottom layer                                 | 12.47-73.91;<br>33.99/29.51;<br>(7)                                           | 1.72-15.14;<br>6.30/5.75;<br>-  | 6.2-30.8;<br>14.13/13.04;<br>-             | 0.74-6.75;<br>2.63/2.47;<br>- |      |
| East China<br>Sea                                 |                                                             | 10.63-38.71;<br>17.00/15.11<br>(7)                                            | 0.78-8.07;<br>2.59/2.24;<br>-   | 6.38-22.46;<br>10.67/9.16;<br>-            | 0.16-4.06;<br>1.45/1.48;<br>- |      |
| Nanning                                           | Rain water                                                  | -;<br>84±55/-<br>(11)                                                         | -;<br>15/-;<br>100%             | -;<br>38/-;<br>100%                        | -;<br>2.1/-;<br>83%           |      |
|                                                   | Irrigation                                                  | -;<br>110±90/-<br>(11)                                                        | -;<br>24/-;<br>100%             | -;<br>65/-;<br>100%                        | -;<br>0.007/-;<br>83%         |      |
| Drink water                                       |                                                             |                                                                               |                                 |                                            |                               |      |
| Weifang<br>(8)                                    | Tap water                                                   | 162-253;<br>215/218;<br>(6)                                                   | 153-238;<br>204/212;<br>100%    |                                            |                               | [13] |
| Weifang<br>(4)                                    | Ground water                                                | 3.52-13.9;<br>8.83/8.97;(6)                                                   | 1.55-6.64;<br>3.4/2.58;<br>100% |                                            |                               |      |
| Sewage treatment plant (STP) influent waste water |                                                             |                                                                               |                                 |                                            |                               |      |
| Pearl River<br>Delta                              | Industrial<br>STP1()                                        | 346                                                                           | 79.9                            | 112                                        | 10.5                          | [14] |
|                                                   | STP2                                                        | 2842                                                                          | 86.2                            | 128                                        | 26.4                          |      |
|                                                   | STP3                                                        | 610                                                                           | 113                             | 185                                        | LOQ                           |      |
|                                                   | STP4                                                        | 361                                                                           | LOQ                             | 70.0                                       | LOQ                           |      |
|                                                   | STP5                                                        | 305                                                                           | 33.1                            | 62.5                                       | 95.7                          |      |
|                                                   | STP6                                                        | 65.8                                                                          | 19.2                            | 14.0                                       | LOQ                           |      |
|                                                   | STP7                                                        | 1065                                                                          | 126                             | 638                                        | LOQ                           |      |

|                       |                                                   |                             |                             |                             |                           |      |
|-----------------------|---------------------------------------------------|-----------------------------|-----------------------------|-----------------------------|---------------------------|------|
| Shanghai <sup>a</sup> | STP8                                              | 412                         | 23.7                        | 102                         | 8.91                      | [1]  |
|                       | STP1(Jun 2018)                                    | 2142.546                    | 218.22                      | 289.61                      | 30.20                     |      |
|                       | STP2(Jun 2018)                                    | 881.77                      | 186.45                      | 314.57                      | 44.15                     |      |
|                       | STP3(Jun 2018)                                    | 634.04                      | 106.05                      | 225.73                      | 111.79                    |      |
|                       | STP4(Jun 2018)                                    | 1325.82                     | 329.044                     | 555.66                      | 77.60                     |      |
|                       | STP5(Jun 2018)                                    | 1111.02                     | 120.11                      | 306.19                      | 417.38                    |      |
|                       | STP6(Jun 2018)                                    | 1196.43                     | 521.75                      | 426.67                      | 57.86                     |      |
|                       | STP7(Jun 2018)                                    | 2406.40                     | 227.75                      | 545.88                      | 136.64                    |      |
| Pearl River Delta     | Sewage treatment plant (STP) effluent waste water |                             |                             |                             |                           | [14] |
|                       | Industrial STP1()                                 | 245(9)                      | 17.1                        | 58.5                        | 9.09                      |      |
|                       | STP2                                              | 2710(9)                     | 31.9                        | 87.3                        | 21.5                      |      |
|                       | STP3                                              | 135(9)                      | 17.2                        | 56.5                        | 7.90                      |      |
|                       | STP4                                              | 50.9(9)                     | LOQ                         | 34.1                        | 1.74                      |      |
|                       | STP5                                              | 69.9(9)                     | 13.1                        | 26.4                        | 10.0                      |      |
|                       | STP6                                              | 37.2(9)                     | 13.5                        | 14.1                        | LOQ                       |      |
|                       | STP7                                              | 6.37(9)                     | LOQ                         | 5.40                        | LOQ                       |      |
| Hebei Heng Shui       | STP8                                              | 202(9)                      | 31.5                        | 104                         | 8.92                      | [15] |
|                       | Manufacturing plant (Dec 2016)                    | 7100-33000; 20000/20000 (4) | 3000-15000; 8900/8900       | 4100-18000; 11000/11000     |                           |      |
| Shanghai <sup>a</sup> | STP1(Jun 2018)                                    | 752.53                      | 215.65                      | 295.43                      | 47.63                     |      |
|                       | STP2(Jun 2018)                                    | 818.99                      | 205.45                      | 267.39                      | 36.48                     |      |
|                       | STP3(Jun 2018)                                    | 469.26                      | 77.97                       | 186.42                      | 45.55                     |      |
|                       | STP4(Jun 2018)                                    | 852.95                      | 222.12                      | 366.35                      | 55.73                     |      |
|                       | STP5(Jun 2018)                                    | 610.10                      | 133.36                      | 277.31                      | 36.05                     |      |
|                       | STP6(Jun 2018)                                    | 1057.19                     | 606.68                      | 278.21                      | 49.52                     |      |
|                       | STP7(Jun 2018)                                    | 810.60                      | 170.50                      | 318.39                      | 40.14                     |      |
| Snow                  |                                                   |                             |                             |                             |                           |      |
| Nanjing               | Urban area (Jan 2019)                             | 229.1-1175.0; 746/858; (11) | 58.9-126.0; 79.1/72.5; 100% | 25.6-173.0; 76.8/59.0; 100% | 35.3-460.0; 198/157; 100% | [16] |

The full names for OPEs are summarized in Table 1. -:data not available. nd: not detected.

**Table S2.** Comparison of concentrations (range; arithmetic mean/median; Detection ratio% ng/L) of the total organophosphate esters and the predominant Alkyl phosphate in water from various water environments in China.

| Location | TiBP | TEP | TMP | TPP | TNBP | TDBPP | TBOEP | TEHP | TBEP | Reference |
|----------|------|-----|-----|-----|------|-------|-------|------|------|-----------|
|----------|------|-----|-----|-----|------|-------|-------|------|------|-----------|

| River water            |                                  |                                                                          |                                  |                                 |                                  |                                   |                                   |                                    |                                   |
|------------------------|----------------------------------|--------------------------------------------------------------------------|----------------------------------|---------------------------------|----------------------------------|-----------------------------------|-----------------------------------|------------------------------------|-----------------------------------|
| Shanghai<br>(28) urban | 10.8-68.8;<br>27.7/20.6;<br>100% |                                                                          |                                  |                                 |                                  | 11.6-63.3;<br>29.9/23.3;<br>100%  |                                   |                                    | 15.9-100.6;<br>46.6/46.2;<br>100% |
|                        | 9.29-45.1;<br>29.8/30.1;<br>100% |                                                                          |                                  |                                 |                                  | 6.91-44.8;<br>25/24.7;<br>100%    |                                   |                                    | <16.6-47.9;<br>23.6/20.3;<br>67%  |
| Beijing (340)          | <LOD-169;<br>23.3/14.1;<br>93.6% | <LOD-2072;<br>88.7/47.5;<br>94.7%                                        | <LOD-9497;<br>144/48.3;<br>88.2% |                                 |                                  | <LOD-256;<br>19.6/10.1;<br>84.9%  | <LOD-23.5;<br>0.91/<LOD;<br>41.7% | <LOD-3617;<br>116/22.8;<br>90.2%   | [2]                               |
|                        |                                  |                                                                          |                                  |                                 |                                  |                                   |                                   |                                    |                                   |
| Chengdu                |                                  |                                                                          |                                  |                                 |                                  | 36.1685.41;<br>-/-;<br>100%       | 30.55-143.75;<br>-/-;<br>100%     | 274.25-10186.61;<br>-/-;<br>100%   | [3]                               |
| Pearl river            |                                  |                                                                          |                                  |                                 |                                  |                                   |                                   | <LOD-200;<br>73.98/62.35<br>;      |                                   |
| Dongjiang<br>river     |                                  |                                                                          |                                  |                                 |                                  |                                   |                                   | -                                  |                                   |
|                        |                                  |                                                                          |                                  |                                 |                                  |                                   |                                   | 3.38-45.1;<br>17.46/14.73<br>;     | [4]                               |
| Yangtze<br>river Basin | 3.90-9.58;<br>6.51/3.68;<br>100% | 10.4-30.9;<br>15.1/13.8;<br>100%                                         | <LOD;<br><LOD/<LOD;<br>D;<br>0   | <LOD;<br><LOD/<LOD;<br>OD;<br>0 | 4.8-8.86;<br>6.98/6.90;<br>100%  |                                   |                                   | <LOD-2.10;<br>1.91/1.90;<br>87.5%; |                                   |
|                        | 1.50-3032;<br>55.7/7.91;<br>100% | <LOD-602;<br>30.1/13.6;<br>96.6%                                         | <LOD-48.2;<br>47.8/47.8;<br>2.3% | <LOD;<br><LOD/<LOD;<br>OD;<br>0 | 2.43-1132;<br>34.3/10.4;<br>100% | <LOD-23.9;<br>3.77/2.16;<br>96.6% | <LOD-3156;<br>116/3.75;<br>38.6%  | [5]                                |                                   |
| Yi River               |                                  | -;<br>10.1/-;<br>-                                                       | -;<br>43.1/-;<br>-               |                                 | -;<br>0.76/-;<br>-               | -;<br>0.64/-;<br>-                | -;<br>0.44/-;<br>-                | -;<br>0.03/-;<br>-                 |                                   |
| Fangting<br>River      |                                  | -;<br>5.66/-;<br>-                                                       | -;<br>253/-;<br>-                |                                 | -;<br>1.81/-;<br>-               | -;<br>0.68/-;<br>-                | -;<br>0.43/-;<br>-                | -;<br>0.05/-;<br>-                 | [6]                               |
| Lake                   |                                  |                                                                          |                                  |                                 |                                  |                                   |                                   |                                    |                                   |
| Luoma Lake             |                                  | <9-32.1;<br>11.7/10.5;<br>88%                                            | <10-127;<br>25.2/16.4;<br>88%    |                                 | 0.01-5.85;<br>2.37/1.81;<br>100% | <0.70;<br>0.38/0.65;<br>63%       | 0.05-1.73;<br>0.79/0.95;<br>100%  | 0.02-10.8;<br>5.79/6.29;<br>100%   |                                   |
| Taihu Lake<br>(25)     |                                  | 53-1.4×10 <sup>3</sup> ;<br>6.2×10 <sup>2</sup> ×10 <sup>2</sup><br>100% | 2.7-84;<br>28/23;<br>100%        |                                 | 0;<br>0/0;<br>0%                 | Nd-4.2;<br>1.6/2.5;<br>56%        | Nd-14;<br>3.1/2.0;<br>80%         | Nd-2.7;<br>0.11/0;<br>4%           | [7]                               |

|                                                   |                                    |                                     |                          |                                          |      |
|---------------------------------------------------|------------------------------------|-------------------------------------|--------------------------|------------------------------------------|------|
| Taihu Lake (29)                                   | 6.51-64.5;0.187/-;100%             | 5.05-334;0.099/-;100%               | 5.08-259;2.41/-;100%     | Nd-0.249;0.993/-;48.3%                   | [8]  |
| Marine water                                      |                                    |                                     |                          |                                          |      |
| Dalian (14)                                       |                                    | 0.17-4.51;0.94/0.62;-               | 2.78-5.71;4.04/3.88;-    | 0.24-1.09;0.69/0.67;-                    | [9]  |
| Bohai Sea                                         | 2.54-16.69;7.02/5.50;-             | <MLD;<MLD/<MLD;LD;-                 |                          |                                          |      |
| Yellow Sea                                        | 1.48-1.69;3.68/2.71;-              | <MLD-7.65;14.48/13.55;-             |                          |                                          | [11] |
| East China Sea                                    | <MLD;<MLD/<MLD;-                   | <MLD;<MLD/<MLD;LD;-                 |                          |                                          |      |
| Nanning                                           | -;20/-;92%                         | -;4.0/-;92%                         | -;3.0/-;92%              | -;0.07/-;83%                             | [10] |
| Drink water                                       | -;5.9/-;100%                       | -;6.1/-;100%                        | -;1.3/-;67%              | -;0.17/-;83%                             |      |
| Weifang (8)                                       |                                    | 3.54-15.92;7.55/6.60;100%           |                          |                                          |      |
| Weifang (4)                                       |                                    | 0.82-1.19;1.00/0.99;100%            |                          |                                          | [13] |
| Sewage treatment plant (STP) influent waste water |                                    |                                     |                          |                                          |      |
| Pearl River Delta                                 |                                    | 71.0224838.416635.622.5Nd54.5       | 23.4311NdNd30.5NdLOQ79.4 | LOQNdNd27.3LOQ10.224.7                   | [14] |
| Shanghai                                          | 13.6524.4610.3219.1418.220.1516.89 | 50.7855.3562.4895.3481.1676.3477.14 |                          | 1477.00210.8944.1577.0090.3347.151266.67 |      |

| Sewage treatment plant (STP) influent waste water |       |                                  |      |     |                        |      |
|---------------------------------------------------|-------|----------------------------------|------|-----|------------------------|------|
| Pearl River<br>Delta                              |       | 40.1                             | 11.9 | LOQ |                        |      |
|                                                   |       | 2541                             | 23.1 | Nd  |                        |      |
|                                                   |       | 32.3                             | 18.4 | Nd  |                        |      |
|                                                   |       | LOQ                              | Nd   | Nd  |                        |      |
|                                                   |       | LOQ                              | 11.4 | Nd  |                        |      |
|                                                   |       | 3.61                             | 4.64 | Nd  |                        |      |
|                                                   |       | Nd                               | Nd   | Nd  |                        |      |
|                                                   |       | 38.0                             | 13.6 | Nd  |                        | [14] |
| Shanghai                                          | 35.61 | 34.77                            |      |     | 50.14                  |      |
|                                                   | 35.38 | 74.05                            |      |     | 149.48                 |      |
|                                                   | 16.87 | 40.11                            |      |     | 38.79                  |      |
|                                                   | 18.71 | 28.37                            |      |     | 84.77                  |      |
|                                                   | 12.71 | 23.64                            |      |     | 54.18                  |      |
|                                                   | 40.56 | 29.83                            |      |     | 17.00                  |      |
|                                                   | 19.45 | 15.78                            |      |     | 159.58                 |      |
|                                                   |       | Snow                             |      |     |                        |      |
| Nanjing                                           |       | 19.0-75.9; 19.3-77.1; 11.9-85.6; |      |     | 12.1-219.0; 3.0-173.0; |      |
|                                                   |       | 41.7/30.8; 42.4/31.3; 48.3/47.2; |      |     | 62.3/25.7; 76.8/59.0;  | [16] |
|                                                   |       | 100% 100% 100%                   |      |     | 100% 100%              |      |

The arrangement and detailed descriptions of the matrices are in accordance with Table S1 without specification. The full names for OPEs are summarized in Table 1. -:data not available. nd: not detected.

**Table S3.** Comparison of concentrations (range; arithmetic mean/median; ng/L) of the total organophosphate esters and the predominant Aryl phosphate in water from various water environments in China.

| Location               | o-TTP/<br>m-TTP/<br>p-TTP                            | TCrP                              | CDPP                              | TMPP | TPHP                                                 | EHDPP                                                                 | Reference |
|------------------------|------------------------------------------------------|-----------------------------------|-----------------------------------|------|------------------------------------------------------|-----------------------------------------------------------------------|-----------|
| River Water            |                                                      |                                   |                                   |      |                                                      |                                                                       |           |
| Shanghai (28)<br>urban |                                                      |                                   |                                   |      | 1.67-47.7;<br>10.3/6.31;<br>100%                     |                                                                       | [1]       |
| Shanghai (28)<br>rural |                                                      |                                   |                                   |      | 5.03-34.3;<br>14.5/12.6;<br>100%                     |                                                                       |           |
| Beijing (340)          |                                                      | <LOD-<br>4.29;0.18/<LOD;37.5<br>% | <LOD-<br>4.85;0.43/0.03;48.5<br>% |      | 96.3;4.49/1.31;74.8<br>%                             | 40.3;0.38/<LOD;6.7<br>%                                               | [2]       |
| Chengdu                |                                                      |                                   |                                   |      | 47.72-164.81;-<br>/-;100%                            |                                                                       | [3]       |
| Pearl river            |                                                      |                                   |                                   |      | 2.74-58;<br>23.46/21.35;<br>-                        |                                                                       |           |
| Dongjiang<br>River     |                                                      |                                   |                                   |      | 4.73-100;<br>32.66/27.35;<br>-                       |                                                                       | [4]       |
| Yangtze river<br>basin | <LOD;<br><LOD/<L<br>OD;0<br><LOD;<br><LOD/<L<br>OD;0 |                                   |                                   |      | <LOD;<br><LOD/<LOD;<br>0<br><LOD;<br><LOD/<LOD;<br>0 | <LOD-22.1;<br>11.9/11.5;<br>87.5%<br><LOD-1.83;<br>1.83/1.83;<br>1.1% | [5]       |

|                                                   |                                                                                                                                                                                                          |                                  |                                  |                                |
|---------------------------------------------------|----------------------------------------------------------------------------------------------------------------------------------------------------------------------------------------------------------|----------------------------------|----------------------------------|--------------------------------|
| Yi River (1)                                      | 1.39                                                                                                                                                                                                     | 0.26                             | 1.09                             |                                |
| Fangting River (1)                                | 3.34                                                                                                                                                                                                     | 0.64                             | 2.18                             | [6]                            |
| Lake water                                        |                                                                                                                                                                                                          |                                  |                                  |                                |
| Luoma Lake (14)                                   | 0.71-54.6;<br>6.36/2.13;100%                                                                                                                                                                             | 0.15-8.16;<br>1.80/0.86;<br>100% | <2-3.39;<br>1.86/1.90;<br>88%    | [6]                            |
| Taihu Lake (25)                                   | Nd-1.5;<br>8.8×10 <sup>-2</sup> /0;<br>12%                                                                                                                                                               | Nd-14;<br>1.8/0.97;<br>84%       | 0.88-12;<br>2.8/2.2;<br>100%     | [7]                            |
| Taihu Lake (29)                                   |                                                                                                                                                                                                          | Nd-0.997;<br>0.007/-;<br>55.2%   | Nd-97.5;<br>0.145/-;<br>37.9%    | Nd-0.252;<br>0.031/-;<br>13.8% |
| Marine water                                      |                                                                                                                                                                                                          |                                  |                                  |                                |
| Dalian (14)                                       |                                                                                                                                                                                                          | 0.11-0.56;<br>0.31/0.2           | 0.49-2.51;<br>0.85/0.59          | 0.08-0.5;<br>0.31/0.33         |
| Bohai Sea                                         |                                                                                                                                                                                                          |                                  | 0.07-3.14;<br>0.578/0.16;<br>-   |                                |
| Yellow Sea                                        |                                                                                                                                                                                                          |                                  | 0.05-0.43;<br>0.20/0.15;<br>-    | [11]                           |
| East China Sea                                    |                                                                                                                                                                                                          |                                  |                                  |                                |
| Nanning                                           |                                                                                                                                                                                                          | -;<br>7.5/-;<br>100%             | -;<br>1.0/-;<br>100%             | [10]                           |
| Drink water                                       |                                                                                                                                                                                                          |                                  |                                  |                                |
| Weifang (8)                                       | Nd-8.97;<br>1.21/nd;<br>37.5%/<br>Nd-5.45;<br>0.80/0.14;<br>87.5%/<br>Nd-1.75;<br>0.25/0.05;<br>62.5%<br>Nd-0.52;<br>0.13/nd;<br>25%<br>0.10-0.28;<br>0.15/0.11;<br>100%/<br>Nd-0.07;<br>0.02/nd;<br>25% |                                  | 0.88-7.96;<br>1.34/0.37;<br>100% | [13]                           |
| Weifang (4)                                       |                                                                                                                                                                                                          |                                  | 0.83-5.91;<br>4.20/5.03;<br>100% |                                |
| Sewage treatment plant (STP) influent waste water |                                                                                                                                                                                                          |                                  |                                  |                                |





|                                                   |                                                           |                                                     |                                                |                                     |                                             |      |
|---------------------------------------------------|-----------------------------------------------------------|-----------------------------------------------------|------------------------------------------------|-------------------------------------|---------------------------------------------|------|
| Luoma Lake (6)                                    | Include the estuary and lake outlet (Nov 2016)            | 0.04-35.9;<br>21.0/28.7;<br>(12)                    | 0.01-1.72;<br>0.38/0.17;<br>100%               | <-0.11;<br>0.06/0.07;<br>67%        | <-0.03;<br>0.01/0.02;<br>67%                | [6]  |
| Taihu Lake                                        | Meiliang Bay                                              | 5.23-9.01;                                          | 1.01-3.17;                                     | 1.07-1.91;                          | 0.75-1.3;                                   | [19] |
|                                                   | Gonghu Bay                                                | 7.116/7.175;                                        | 1.776/1.535;                                   | 1.466/1.495;                        | 0.991/0.97;                                 |      |
|                                                   | Xukou Bay                                                 | (7)                                                 | -                                              | -                                   | -                                           |      |
| Taihu lake (23)                                   | Taihu Lake and its tributaries (Nov 2016)                 | 8.1-4.2×10 <sup>2</sup> ;<br>97/-;<br>(12)          | Nd-28;<br>3.0/1.8;<br>56%                      | 0.27-10;<br>1.2/0.45;<br>100%       | Nd-2.2;<br>9.5×10 <sup>-2</sup> /0;<br>4.3% | [7]  |
| Taiwan Strait (32)                                |                                                           | 5263-34232;<br>12796/-;<br>(10), pg/g<br>4.35-22.1; | Sea area<br>LOD-4232;<br>1096/-;<br>100%, pg/g | 442-3448;<br>11314/-;<br>100%, pg/g | LOD-206;<br>124/-;<br>100%, pg/g            | [20] |
| Beibu Gulf                                        | Ponds and open areas                                      | -/7.75;<br>(11)<br>4.51-11.7;<br>-/7.42;<br>(11)    |                                                |                                     |                                             | [12] |
| Bohai Sea and vicinity (48)                       | Urbanized and industrializing areas (2012 and 2016)       | 1.76-49.9;<br>12.7/9.13;<br>(9)                     | Nd-14.8;<br>4.36/3.67;<br>58.3%                | Nd-17.9;<br>5.37/3.82;<br>91.7%     | -                                           |      |
| Northern east China (43)                          | Urbanized and industrializing areas (2011)                | 8.58-169;<br>41.6/31.6;<br>(10)                     | Nd-14.5;<br>4.99/4.17;<br>37.2%                | Nd-39.8;<br>6.95/5.37;<br>97.7%     | Nd-4.44;<br>4.44/4.44;<br>2.33%             | [21] |
| Northern Chinese coastal waters (91)              | Urbanized and industrializing areas (2011, 2012 and 2016) | 1.76-169;<br>26.3/20.3;<br>(11)                     | Nd-14.8;<br>4.59/3.77;<br>48.4%                | Nd-39.8;<br>6.14/4.58;<br>94.5%     | Nd-4.44;<br>4.44/4.44;<br>1.10%             |      |
| Sewage treatment plant (STP) influent waste water |                                                           |                                                     |                                                |                                     |                                             |      |
| Henan (24)                                        | (Jan-Mar 2015)                                            |                                                     |                                                |                                     |                                             |      |
| Sewage treatment plant (STP) effluent waste water |                                                           |                                                     |                                                |                                     |                                             |      |
| Hebei Hengshui (6)                                | Manufacturing plant (0-10cm) (Dec 2016)                   |                                                     | 61-79000;<br>29000/22000;<br>-                 | 280-190000;<br>22000/29000;<br>-    |                                             | [17] |
| Sludge                                            |                                                           |                                                     |                                                |                                     |                                             |      |
| The pearl river delta                             | Industrial wastewater                                     | 96.7-88.1;<br>482.4/482.4;                          | 6.9-7.1;<br>7/7;                               | 6.3-7.6;<br>6.95/6.95;<br>-         | 11.8-15;<br>13.4/13.4;<br>-                 | [21] |
| The pearl river delta                             | Domestic wastewater                                       | 100.9-290.2;<br>195.41/184.9;                       | 8.1-15.2;<br>11.09/10;                         | 7.9-35;<br>15.8/13.1;               | 12.6-64;<br>21.84/16.9;                     | [22] |

|                       |                     |                                 |                            |                        |                            |      |
|-----------------------|---------------------|---------------------------------|----------------------------|------------------------|----------------------------|------|
|                       |                     |                                 | -                          | -                      | -                          |      |
| The pearl river delta | Combined wastewater | 265.6-1312.9;<br>657.25/532.55; | 9.8-17.1;<br>13.875/14.15; | 12-54.4;<br>29.2/24.8; | 14.6-41.5;<br>27.74/25.95; | [22] |
|                       |                     |                                 | -                          | -                      | -                          |      |

The full names for OPEs are summarized in Table 1. -;data not available. nd: not detected.

**Table S5.** Comparison of concentrations (range; arithmetic mean/median; ng/g) of the total organophosphate esters (OPEs) and the predominant Alkyl phosphate in sediment from various sediment environments in China.

| Location                             | TEP                                     | TPP                                       | TNBP                                 | TBOEP                               | TDBPP                     | TEHP                               | TiBP                                                              | TMP                             | TBEP                                | Referen<br>ce |
|--------------------------------------|-----------------------------------------|-------------------------------------------|--------------------------------------|-------------------------------------|---------------------------|------------------------------------|-------------------------------------------------------------------|---------------------------------|-------------------------------------|---------------|
| River                                |                                         |                                           |                                      |                                     |                           |                                    |                                                                   |                                 |                                     |               |
| Liao River (24)                      | 0.56-11.4;<br>2.89/1.80;<br>100%        | 0.78-<br>12.6;<br>2.75/1.4<br>0;<br>100%  | 2.88-<br>49.1/16.0/6.95;<br>00%      | 1.11-69.0;<br>11.3/2.73;<br>100%    |                           | 1.36-20.2;<br>4.99/2.44;<br>100%   | 0.30-12.7;<br>3.79/3.33;<br>100%                                  |                                 |                                     | [18]          |
| Chengdu                              |                                         |                                           | 4.66-31.36;<br>-/-;<br>100%          |                                     |                           | 4.78-7.66;<br>-/-;<br>100%         |                                                                   |                                 | 64.46-<br>225.03;<br>-/-;<br>85.71% | [3]           |
| Lake                                 |                                         |                                           |                                      |                                     |                           |                                    |                                                                   |                                 |                                     |               |
| Luoma Lake (6)                       | <-34.5;<br>19.7/25.9;<br>67%            |                                           | <-0.05;<br>0.02/0.02;<br>67%         |                                     | <-0.03;<br>0.01/<;33<br>% | 0.003-0.16;<br>0.05/0.04;<br>100%  |                                                                   | <2.14;<br>0.71/0.6<br>7;<br>67% | <-0.001;<br>0.001/0.001;<br>67%     | [6]           |
| Taihu Lake                           |                                         | <0.2;<br><0.2/<0.<br>2;<br>0              |                                      |                                     |                           |                                    |                                                                   |                                 | 1.38-2.32;<br>1.713/1.615;-         | [19]          |
| Taihu lake (23)                      | Nd-2.8;<br>0.37/0;<br>43%               |                                           | Nd                                   |                                     | Nd                        |                                    |                                                                   | Nd                              | Nd                                  |               |
| Sea area                             |                                         |                                           |                                      |                                     |                           |                                    |                                                                   |                                 |                                     |               |
| Taiwan Strait (32)                   | Nd                                      |                                           | 2994-15332;<br>7916/-;<br>100%, pg/g | Nd-634;<br>343/-;<br>62.5%,<br>pg/g |                           | 91-16803;<br>1821/-;<br>100%, pg/g |                                                                   |                                 |                                     | [20]          |
| Bohai Sea and vicinity (48)          | nd-0.512;<br>0.303/0.295<br>;<br>56.3%  |                                           | Nd-13.1;<br>2.39/1.78;<br>60.4%      | Nd-11.9;<br>1.85/1.20;<br>60.4%     |                           |                                    | Nd-5.69;<br>7.77;<br>1.74/1.47; 2.46/0.8<br>81.3%<br>42;<br>12.5% |                                 |                                     |               |
| Northern east China (43)             | 0.207-3.59;<br>0.711/0.539<br>;<br>100% | nd-<br>2.42;<br>0.934/0.<br>458;<br>9.30% | Nd-25.7;<br>5.51/4.54;<br>95.3%      | Nd-8.03;<br>1.84/1.53;<br>60.5%     |                           |                                    | 3.60-125;<br>22.7/16.7; 474/0.3<br>100%<br>97;18.6<br>%           |                                 |                                     | [21]          |
| Northern Chinese coastal waters (91) | Nd-3.59;<br>0.553/0.393<br>;<br>76.9%   | nd-<br>2.42;<br>0.934/0.<br>458;          | Nd-25.7;<br>4.21/3.22;<br>76.9%      | Nd-11.9;<br>1.84/1.25;<br>60.4%     |                           |                                    | Nd-125;<br>12.7/5.50;<br>90.1%                                    | Nd-<br>7.77;<br>1.33/0.4<br>61; |                                     |               |



|                                                   |                                 |                                 |      |
|---------------------------------------------------|---------------------------------|---------------------------------|------|
| Northern Chinese coastal waters (91)              | Nd-34.5;<br>3.95/2.30;<br>38.5% | Nd-7.28;<br>5.54/5.20;<br>4.40% |      |
| Sewage treatment plant (STP) effluent waste water |                                 |                                 |      |
| Hebei Hengshui                                    | Nd-1.5;<br>0.47/0.48            |                                 | [17] |
|                                                   | -                               |                                 |      |
| The pearl river delta                             | 26.1;<br>26.1/26.1;             |                                 | [22] |
|                                                   | -                               |                                 |      |
| The pearl river delta                             | 16.3-62.9;<br>36.94/37.1;       |                                 | [22] |
|                                                   | -                               |                                 |      |
| The pearl river delta                             | 30.2-656.7;<br>201.16/149.85;   |                                 | [22] |
|                                                   | -                               |                                 |      |

The arrangement and detailed descriptions of the matrices are in accordance with Table S4 without specification. The full names for OPEs are summarized in Table 1. -:data not available. nd: not detect.

**Table S7.** Comparison of concentrations (range; arithmetic mean/median; Detection ratio% ng/m<sup>3</sup>) of the total organo-phosphate esters and the dominant chloroalkyl phosphates in air from various air environments in China.

| Location          | Description of matrix (sample year)                              | ΣOPEs (the total number)                         | TCEP                                           | TCIPP                                         | TDCPP                                            | Reference |
|-------------------|------------------------------------------------------------------|--------------------------------------------------|------------------------------------------------|-----------------------------------------------|--------------------------------------------------|-----------|
| Urban area        |                                                                  |                                                  |                                                |                                               |                                                  |           |
| Zhengzhou         | High-tech development zone; laboratory building (Jun to Nov2018) | 0.30-3.46;<br>1.04/1.36;<br>(6)                  | 0.15-1.71;<br>0.39/0.60;<br>100%               | 0.04-1.76;<br>0.22/0.41;<br>100%              |                                                  | [24]      |
| Dalian (2)        | Bohai Sea and Yellow Sea urban district (Sep 2017)               | 0.21-0.36;<br>0.29/-<br>(9)                      | 0.091-0.194;<br>0.142/-;<br>-                  | 0.082-0.115;<br>0.098/-;<br>-                 | 0.001-0.003;<br>0.002/-;<br>-                    | [15]      |
| Nanning           | Urban and urban                                                  | -;<br>420±330/-;<br>(11)<br>(pg/m <sup>3</sup> ) | -;<br>140/-;<br>92%<br>(pg/m <sup>3</sup> )    | -;<br>230/-;<br>100%<br>(pg/m <sup>3</sup> )  | -;<br>0.15/-;<br>17%<br>(pg/m <sup>3</sup> )     | [10]      |
| Beijing1          | 15-20m above the ground level (Apr 2016 and Mar 2017)            | 174-3300;<br>1160/987;<br>(8) pg/m <sup>3</sup>  | 13-1090;<br>270/150;<br>-, pg/m <sup>3</sup>   | 4205-865;<br>396/340;<br>-, pg/m <sup>3</sup> | 20.1-114;<br>54.8/47.9;<br>-, pg/m <sup>3</sup>  |           |
| Beijing2          | 15-20m above the ground level (Apr 2016 and Mar 2017)            | 310-3666;<br>1450/1230;<br>(8) pg/m <sup>3</sup> | 42.9-1670;<br>449/260;<br>-, pg/m <sup>3</sup> | 83.4-773;<br>313/241;<br>-, pg/m <sup>3</sup> | 14.5-88.7;<br>52.1/52.8;<br>-, pg/m <sup>3</sup> | [15]      |
| Beijing (average) |                                                                  |                                                  | 0.406                                          | 1.503                                         | 0.0369                                           |           |

|                                         |                                                                                         |                                                  |                                                         |                                                |                                                  |      |
|-----------------------------------------|-----------------------------------------------------------------------------------------|--------------------------------------------------|---------------------------------------------------------|------------------------------------------------|--------------------------------------------------|------|
| Tianjin                                 | 15-20m above the ground level (Apr 2016 and Mar 2017)                                   | 674-5250;<br>2180/1590;<br>(8) pg/m <sup>3</sup> | 96-1370;<br>432/283;<br>-, pg/m <sup>3</sup>            | 159-3190;<br>1080/920;<br>-, pg/m <sup>3</sup> | 12.5-254;<br>111/88.6;<br>-, pg/m <sup>3</sup>   |      |
| Shijiazhuang                            | 15-20m above the ground level (Apr 2016 and Mar 2017)                                   | 417-3180;<br>1500/1410<br>(8) pg/m <sup>3</sup>  | 80.3-960;<br>321/218;<br>-, pg/m <sup>3</sup>           | 26.3-1009;<br>443/426;<br>-, pg/m <sup>3</sup> | 39.1-818;<br>268/93.8;<br>-, pg/m <sup>3</sup>   |      |
| Baoshan (55)                            | Sub-urban near the cement and chemical industrial plants and residential areas (2008)   | 1.8-53.7;<br>19.4/16.6;<br>(6)                   | 0.2-10.5;<br>3.1/3.5;<br>100%                           | Nd-16.9;<br>3.8/2.9;<br>98%                    | 0.03-16.9;<br>2.3/0.8;<br>100%                   | [25] |
| Xujiahui61()                            | Urban near the residential and office building (2008)                                   | 1.5-54.6;<br>6.6/4.4;<br>(6)                     | 0.1-10.1;<br>2.2/1.8;<br>100%                           | 0.1-9.7;<br>1.4/1.0;<br>100%                   | Nd-23.9;<br>1.0/0.3;<br>97%                      |      |
| Guangdong University of Technology (24) | PM <sub>2.5</sub> samples (May 2017 to Apr 2018)                                        | 4.17-75.2;<br>15.9/15.2;<br>(11)                 | 0.77-3.61;<br>1.84/1.69;<br>100%                        | 0.81-16.6;<br>4.07/4.13;<br>100%               | 0.12-2.76;<br>0.41/0.32;<br>100%                 |      |
| Guangzhou (24)                          | South China Institute of Environmental Science PM <sub>2.5</sub> (May 2017 to Apr 2018) | 4.01-53.1;<br>13.5/14.0;<br>(11)                 | 0.73-3.77;<br>1.64/1.75;<br>100%                        | 0.76-16.0;<br>3.90/4.27;<br>100%               | 0.12-1.09;<br>0.38/0.36;<br>100%                 | [26] |
| Taiyuan (24)                            | Shanxi University PM <sub>2.5</sub> (May 2017 to Apr 2018)                              | 3.10-544;<br>19.5/19.4;<br>(11)                  | 0.46-183;<br>4.11/2.73;<br>100%                         | 0.56-9.24;<br>2.10/2.30;<br>100%               | 0.03-20.4;<br>0.38/0.33;<br>100%                 |      |
| Remote area                             |                                                                                         |                                                  |                                                         |                                                |                                                  |      |
| Rural of Beijing 1                      | The northern east of Beijing 15-20m above the ground level (Apr 2016 and Mar 2017)      | 139-1508;<br>531/457;<br>(8) pg/m <sup>3</sup>   | 5.22-146;<br>51.4/50.4;<br>- pg/m <sup>3</sup>          | 80.8-1070;<br>318/209;<br>- pg/m <sup>3</sup>  | 1.73-36.5;<br>17.2/13.2;<br>- pg/m <sup>3</sup>  | [15] |
| Bohai and Yellow Seas                   | (Jun and Jul 2016)                                                                      | 2.3-270;<br>150/170;<br>(9)                      | Sea area<br>Nd-73;<br>38/38;<br>100%, pg/m <sup>3</sup> | Nd-130;<br>45/42;<br>100%, pg/m <sup>3</sup>   | Nd-4.3;<br>0.81/0.57;<br>100%, pg/m <sup>3</sup> | [27] |

|                          |                                                       |                                                     |                                                |                                                |                                                |      |
|--------------------------|-------------------------------------------------------|-----------------------------------------------------|------------------------------------------------|------------------------------------------------|------------------------------------------------|------|
| North Huangcheng Island  | (Jun and Jul 2016)                                    | 1.2-360;<br>47/31;<br>(9)                           | 0.69-120;<br>14/10;<br>100%, pg/m <sup>3</sup> | 0.69-120;<br>14/10;<br>100%, pg/m <sup>3</sup> | Nd-2.6;<br>0.35/Nd;<br>100%, pg/m <sup>3</sup> |      |
| Northern South China Sea | (Sep-Oct 2013)                                        | 47.1-160.9;<br>92.9/90.4;<br>(8), pg/m <sup>3</sup> | 14-107;<br>46.1/43.5;<br>-, pg/m <sup>3</sup>  | 15-38;<br>24.6/25;<br>-, pg/m <sup>3</sup>     | 1.3-4.5;<br>2.64/2.2;<br>-, pg/m <sup>3</sup>  | [28] |
| Beijing (15)             | Dormitories, residential homes and offices (2014-015) | 1.0-20;<br>5.2/4.7;<br>(14)                         | 0.063-3.8;<br>0.50/0.17;<br>100%               | 0.28-14;<br>3.8/3.8;<br>100%                   | Nd-0.025;<br>0.0038/Nd;<br>20%                 | [29] |
| Harbin                   | Dayside bedroom                                       | 1.8-460;<br>35/9.1;<br>100% (12)                    | 0.16-60;<br>5.2/0.89;<br>100%                  | Nd-390;<br>24/3.9;<br>97.2%                    | Nd-2.66;<br>0.48/0.25;<br>77.8%                |      |
|                          | Nightside bedroom                                     | 0.41-160;<br>27/15;<br>100% (12)                    | Nd-7.8;<br>1.0/0.75;<br>94.7%                  | Nd-80;<br>15/12;<br>97.4%                      | Nd-1.6;<br>0.38/0.25;<br>84.2%                 | [30] |
|                          | Living room                                           | 6.8-940;<br>130/59;<br>100% (12)                    | Nd-15;<br>3.7/2.9;<br>96.7%                    | 3.4-930;<br>120/54;<br>100%                    | Nd-2.6;<br>0.60/0.55;<br>80.0%                 |      |

The full names for OPEs are summarized in Table 1. -:data not available. nd: not detected.

**Table S8.** Comparison of concentrations (range; arithmetic mean/median; Detection ratio% ng/m<sup>3</sup>) of the total organo-phosphate esters and the predominant Alkyl phosphates in air from various air environments in China.

| Location          | TEP | TPP | TNBP                                       | TiBP                                        | TBOEP                                      | TEHP                                        | TMP | TBEP                                            | Reference |
|-------------------|-----|-----|--------------------------------------------|---------------------------------------------|--------------------------------------------|---------------------------------------------|-----|-------------------------------------------------|-----------|
| Urban area        |     |     |                                            |                                             |                                            |                                             |     |                                                 |           |
| Zhengzhou         |     |     | 0.03-0.42;<br>0.14/0.17<br>100%            |                                             |                                            |                                             |     | <0.0002-0.16;<br>0.01/0.03<br>83%               | [24]      |
| Dalian (2)        |     |     | 0.025-0.025;<br>0.025/-                    |                                             | 0.004-0.006;<br>0.005/-;<br>-              | Nd-nd;<br>nd/-;<br>-                        |     |                                                 | [15]      |
| Nanning           |     |     | -;<br>18/-;<br>75%<br>(pg/m <sup>3</sup> ) | -;<br>11/-;<br>100%<br>(pg/m <sup>3</sup> ) | -;<br>20/-;<br>75%<br>(pg/m <sup>3</sup> ) | -;<br>0.09/-;<br>8%<br>(pg/m <sup>3</sup> ) |     |                                                 | [10]      |
| Beijing1          |     |     |                                            |                                             |                                            |                                             |     | 0.08-266;<br>65.3/63.1;<br>-, pg/m <sup>3</sup> |           |
| Beijing2          |     |     |                                            |                                             |                                            |                                             |     | 9.99-937;<br>143/47.6;<br>-, pg/m <sup>3</sup>  |           |
| Beijing (average) |     |     |                                            |                                             |                                            |                                             |     | 0.0708                                          | [15]      |
| Tianjin           |     |     |                                            |                                             |                                            |                                             |     | 5.68-134;<br>44.2/25.6;<br>-, pg/m <sup>3</sup> |           |
| Shijiazhuang      |     |     |                                            |                                             |                                            |                                             |     | 1.82-625;<br>106/57.3;<br>-, pg/m <sup>3</sup>  |           |
| Baoshan (55)      |     |     |                                            |                                             |                                            |                                             |     | Nd-6.6;<br>0.1/Nd;                              | [25]      |

|                                                     |                                  |                                   |                                                 |                                                  |                                                  |                                                                |      |
|-----------------------------------------------------|----------------------------------|-----------------------------------|-------------------------------------------------|--------------------------------------------------|--------------------------------------------------|----------------------------------------------------------------|------|
|                                                     |                                  |                                   |                                                 |                                                  |                                                  | 4%<br>Nd-0.7;<br>0.01/Nd;<br>2%                                |      |
| Xujiahui<br>(61)                                    |                                  |                                   |                                                 |                                                  |                                                  |                                                                |      |
| Guangdong<br>University<br>of<br>Technology<br>(24) | 0.19-1.29;<br>0.55/0.59;<br>100% | 0.26-3.99;<br>1.42/1.37;<br>100%  | 0.23-8.84;<br>1.52/1.63;<br>100%                | Nd-0.82;<br>0.10/0.09;<br>34.8%                  | 0.42-5.95;<br>0.96/0.73;<br>100%                 |                                                                |      |
| Guangzhou<br>(24)                                   | 0.21-1.70;<br>0.53/0.59;<br>100% | 0.32-3.06;<br>1.02/1.10;<br>100%  | 0.24-9.56;<br>0.88/0.99;<br>100%                | Nd-0.71;<br>0.05/0.07;<br>50%                    | 0.31-2.17;<br>0.70/0.63;<br>100%                 |                                                                | [26] |
| Taiyuan (24)                                        | 0.62-13.3;<br>1.64/1.55;<br>100% | 0.29-4.71;<br>1.17/1.35;<br>100%  | 0.44-182;<br>2.65/2.12;<br>100%                 | 0.06-2.12;<br>0.44/0.45;100%                     | 0.11-39.0;<br>1.02/0.67;<br>100%                 |                                                                |      |
| Remote area                                         |                                  |                                   |                                                 |                                                  |                                                  |                                                                |      |
| Rural of<br>Beijing                                 |                                  |                                   |                                                 |                                                  |                                                  | 7.93-61.4;<br>28.2/21.3;<br>-, pg/m <sup>3</sup>               | [15] |
| Sea area                                            |                                  |                                   |                                                 |                                                  |                                                  |                                                                |      |
| Bohai and<br>Yellow Seas                            |                                  |                                   | 0.46-36;<br>8.9/8.0;<br>100%pg/m <sup>3</sup>   | 0.30-170;<br>34/30;<br>100%pg/m <sup>3</sup>     | Nd-5.3;<br>1.6/1.0;<br>93%,<br>pg/m <sup>3</sup> |                                                                | [27] |
| North<br>Huangchen<br>g Island                      |                                  |                                   | Nd-190;<br>11/2.7;<br>100%<br>pg/m <sup>3</sup> | Nd-82;<br>8.1/4.8;<br>100%,<br>pg/m <sup>3</sup> | Nd-30;<br>2.3/1.1;<br>93%<br>pg/m <sup>3</sup>   |                                                                |      |
| Northern<br>South China<br>Sea                      |                                  |                                   | 1.4-4.8;<br>2.73/2.5;<br>-, pg/m <sup>3</sup>   | 1.1-3.8;<br>2.25/2.1;<br>-, pg/m <sup>3</sup>    | 2.3-16;<br>5.02/3.6;<br>-, pg/m <sup>3</sup>     |                                                                | [28] |
| Beijing (15)                                        | 0.20-0.83;<br>0.47/0.39;<br>100% | 0.063-0.40;<br>0.18/0.17;<br>100% | 0.069-0.33;<br>0.17/0.15;<br>100%               | Nd;<br>Nd/Nd;<br>-                               |                                                  | Nd-0.14; 0.0014-0.013;<br>0.017/Nd; 0.0043/0.0027;<br>33% 100% | [29] |
| Harbin                                              | Nd-0.36;<br>0.09/0.05;<br>97.2%  | 0.06-0.96;<br>0.47/0.49;<br>100%  | 0.11-5.6;<br>1.9/1.8;<br>100%                   | Nd-62;<br>2.1/nd;<br>13.9%                       | Nd-0.51;<br>0.15/0.11;<br>91.7%                  |                                                                |      |
|                                                     | Nd-0.26;<br>0.07/0.06;<br>92.1%  | 0.01-1.4;<br>0.44/0.40;<br>100%   | Nd-3.4;<br>0.97/0.58;<br>97.4%                  | Nd-70;<br>3.8/nd;<br>13.2%                       | Nd-2.9;<br>0.17/0.04;<br>71.1%                   |                                                                | [30] |
|                                                     | Nd-0.27;<br>0.06/0.03;<br>86.7%  | Nd-5.3;<br>0.51/0.21;<br>100%     | 0.02-1.8;<br>0.45/0.34;<br>100%                 | Nd-9.7;<br>0.37/nd;<br>6.7%                      | Nd-0.31;<br>0.08/0.05;<br>93.3%                  |                                                                |      |

The arrangement and detailed descriptions of the matrices are in accordance with Table S10 without specification. The full names for OPEs are summarized in Table 1. -data not available. nd: not detected.

**Table S9.** Comparison of concentrations(range; arithmetic mean/median; Detection ratio% ng/m<sup>3</sup>) of the total organo-phosphate esters(OPEs) and the predominant Aryl phosphate in air from various air environments in China.

| Location   | TCrP                        | CDPP | TMPP | TPHP                     | EHDPP | Reference |
|------------|-----------------------------|------|------|--------------------------|-------|-----------|
| Urban area |                             |      |      |                          |       |           |
| Zhengzhou  | <0.0137-0.18;<br>0.02/0.05; |      |      | 0.03-0.36;<br>0.09/0.11; |       | [24]      |

|                                                  | 87%                              |                                        | 100%                                             |                                                |      |
|--------------------------------------------------|----------------------------------|----------------------------------------|--------------------------------------------------|------------------------------------------------|------|
| Dalian (2)                                       |                                  | 0.001-0.005;<br>0.003/-<br>-;          |                                                  | 0.003-0.003;<br>0.003/-;<br>-                  | [15] |
| Nanning                                          |                                  | 0.37/-;<br>25%<br>(pg/m <sup>3</sup> ) | -;<br>0.56/-;<br>17%<br>(pg/m <sup>3</sup> )     |                                                | [10] |
| Beijing1                                         |                                  |                                        |                                                  | 32.3-216;<br>102/99.6;<br>-, pg/m <sup>3</sup> |      |
| Beijing2                                         |                                  |                                        |                                                  | 39.4-418;<br>156/106;<br>-, pg/m <sup>3</sup>  |      |
| Beijing<br>(average)                             |                                  |                                        |                                                  | 0.091                                          | [15] |
| Tianjin                                          |                                  |                                        |                                                  | 41.6-2516;<br>113/101;<br>-, pg/m <sup>3</sup> |      |
| Shijiazhuang                                     |                                  |                                        |                                                  | 45.3-338;<br>147/156;<br>-, pg/m <sup>3</sup>  |      |
| Baoshan<br>(55)                                  |                                  |                                        | 0.2-32.0;<br>7.2/5.9;<br>100%                    |                                                |      |
| Xujiahu<br>(61)                                  |                                  |                                        | 0.06-14.0;<br>1.3/0.5;<br>100%                   |                                                | [25] |
| Guangdong<br>University of<br>Technology<br>(24) | 0.51-20.6;<br>2.27/1.90;<br>100% |                                        | 0.33-5.18;<br>1.71/1.81;<br>100%                 | 0.31-5.56;<br>1.03/0.91;<br>100%               |      |
| Guangzhou<br>(24)                                | 0.55-8.18;<br>2.13/2.12;<br>100% |                                        | 0.37-4.32;<br>1.54/1.40;<br>100%                 | 0.40-2.53;<br>0.77/0.70;<br>100%               | [26] |
| Taiyuan (24)                                     | 0.3-33.7;<br>4.59/6.72;<br>100%  |                                        | 0.13-49.4;<br>0.98/0.72;<br>100%                 | 0.07-7.39;<br>0.47/0.47;<br>100%               |      |
|                                                  |                                  | Remote area                            |                                                  |                                                |      |
| Rural of<br>Beijing                              |                                  |                                        |                                                  | 10.4-47;<br>28.4/25.3;<br>-, pg/m <sup>3</sup> | [15] |
|                                                  |                                  | Sea area                               |                                                  |                                                |      |
| Bohai and<br>Yellow Seas                         |                                  |                                        | 0.19-4.7;<br>2.0/1.7;<br>100%, pg/m <sup>3</sup> |                                                |      |
| North<br>Huangcheng<br>Island                    |                                  |                                        | 0.17-22;<br>4.4/2.7;<br>100%, pg/m <sup>3</sup>  |                                                | [27] |
| Beijing (15)                                     | Nd-0.0019;<br>0.00029/Nd;<br>47% | Nd-0.013;<br>0.0023/0.0010;<br>67%     | 0.0091-0.43;<br>0.078/0.034;<br>100%             | 0.0028-0.056;<br>0.015/0.084;<br>100%          | [29] |



|        |            |          |      |
|--------|------------|----------|------|
| Haibin | 0.01-7.3;  | Nd-0.12; | [30] |
|        | 0.28/0.06; | 0.02/nd; |      |
|        | 100%       | 19.4%    |      |
|        | Nd-138;    | Nd-0.05; |      |
|        | 4.6/0.04;  | 0.01/nd; |      |
|        | 97.4%      | 23.7%    |      |
|        | 0.01-1.1;  | Nd-0.07; |      |
|        | 0.20/0.12; | 0.01/nd; |      |
|        | 100%       | 30.0%    |      |

The arrangement and detailed descriptions of the matrices are in accordance with Table S10 without specification. The full names for OPEs are summarized in Table 1. -:data not available. nd: not detected.

**Table S10.** Comparison of concentrations (range; arithmetic mean/median; detection ratio ng/g) of the total organophosphate esters ( $\Sigma$ OPEs) and the predominant chlorinated phosphates in dust from various dust environments in China.

| Location            | Description of matrix (sample year)                                              | $\Sigma$ OPEs (the total number)        | TCEP                              | TCIPP                                 | TDCPP                            | Reference |
|---------------------|----------------------------------------------------------------------------------|-----------------------------------------|-----------------------------------|---------------------------------------|----------------------------------|-----------|
| Outdoor             |                                                                                  |                                         |                                   |                                       |                                  |           |
| Beijing road (65)   | Road (Dec-Nov2014)                                                               | 278-11293;1861/933;<br>(14)             | <5-4185;<br>397/247;<br>86.2%     | 57.1-6142;<br>1010/384;<br>100%       | <16-233;37.2/30.7;<br>78.5%      | [31]      |
| Tianjin (17)        | Open recycling sites for outdoor recycling areas                                 | 1390-42700;<br>11500/6590;<br>(12)      | 161-9740;<br>2330/1687;<br>100%   | 50.7-16300;<br>4280/1516;<br>100%     | Nd-4600;<br>587/265;<br>95%      | [32]      |
|                     | Semi-closed recycling sites for workshop areas                                   | 914-7940;<br>3630/2690;<br>(12)         | <91.2-2150;<br>726/411;<br>100%   | 39.9-1270;<br>508/250;<br>100%        | 62.5-599;<br>312/336;<br>95%     |           |
| Nanning             | Dustfall                                                                         | -;<br>2.5 $\pm$ 3.7/-;<br>(11)          | -;<br>0.39/-;<br>100%             | -;<br>1.7/-;<br>100%                  | -;<br>0.001/-;<br>8%             | [10]      |
| Henan street (60)   | Urban street (Jul 2018)                                                          | 2.77-505;<br>92.1/59.3;<br>(8)          | 0.45-129;<br>23.2/13.2;<br>100%   | 0.68-097;<br>33.9/20.4;<br>100%       | -                                | [33]      |
| Nanjing(urban)(8)   | Subway entrance of heavy transportation and chemical industry park (Oct 2017)    | 66.79-367.01;<br>174.39/157.25;<br>(13) | 3.21-15.35;<br>7.81/6.85;<br>100% | 29.61-216.77;<br>90.65/81.99;<br>100% | 1.17-3.46;<br>2.61/2.77;<br>100% | [34]      |
| Nanjing (rural)(10) | Countryside and kindergarten and school (Mar 2016, Dec 2016, Jul 2017, Oct 2017) | 10.89-31.27;<br>20.99/20.08;<br>(13)    | 0.57-12.77;<br>3.25/1.85;<br>100% | 3.21-16.16;<br>7.14/4.12;<br>100%     | 0.45-1.50;<br>0.88/0.80;<br>100% | [34]      |
| Chongqing (37)      | Main road dust (Jul 2016)                                                        | 114-1600;<br>-/292;<br>(12)             | 1.04-103;<br>-/16.4;<br>100%      | Nd-715;<br>-/112;<br>97%              | Nd-209;<br>-/6.59;<br>75.8%      | [35]      |

|                                |                                         |                                     |                                       |                                     |                                     |      |
|--------------------------------|-----------------------------------------|-------------------------------------|---------------------------------------|-------------------------------------|-------------------------------------|------|
| Chongqing (6)                  | Industrial road dust (Jul 2016)         | 103-967;<br>-476;<br>(12)           | Nd-75.5;<br>-29.9;<br>83.3%           | Nd-46.1;<br>-7.94;<br>50%           | Nd-149;<br>-58.1;<br>67%            |      |
| Chongqing (19)                 | Campus walking street dust (Jul 2016)   | 3.69-870;<br>-48.8;<br>(12)         | Nd-16.0;<br>-4.26;<br>78.9%           | Nd-43.9;<br>-5.88;<br>89.5%         | Nd-1.44;<br>-1.44;<br>5.3%          |      |
| Chongqing (28)                 | Campus road dust (Jul 2016)             | 9.15-840;<br>-203;<br>(12)          | Nd-75.6;<br>-4.38;<br>96.4%           | Nd-109;<br>-18.9;<br>89.3%          | Nd-41.0;<br>-16.2;<br>21.4%         |      |
| Chengdu street (31)            | Street dust (Apr 2014)                  | 94-1484.6;<br>512.94/347.89;<br>(7) | 7.8-402.3;<br>87.88/55;<br>100%       | 5.4-278.3;<br>93.87/44.4;<br>100%   | Nd-81.8;<br>17/7.7;<br>74.2%        | [36] |
| Indoor                         |                                         |                                     |                                       |                                     |                                     |      |
| Beijing (13)                   | Dormitory indoor (Feb-Mar, Jul-Aug2015) | 1.5-18;<br>6.9/4.3;<br>(14) ug/g    | 0.30-3.6;<br>1.1/0.81;<br>100%, ug/g  | 0.63-6.2;<br>1.9/1.3;<br>100%, ug/g | Nd-2.1;<br>0.24/nd;<br>46%, ug/g    |      |
| Beijing (39)                   | Residential home (Feb-Mar, Jul-Aug2015) | 1.6-16;<br>5.9/5.9;<br>(14) ,ug/g   | 0.13-3.0;<br>0.97/0.79;<br>100%, ug/g | 0.26-13;<br>1.8/1.4;<br>100%        | Nd-0.93;<br>0.16/0.12;<br>67%, ug/g | [29] |
| Beijing (49)                   | Office (Feb-Mar, Jul-Aug2015)           | 2.8-40;<br>14/11;<br>(14) ,ug/g     | 0.85-14;<br>4.5/3.7;<br>100%, ug/g    | 0.33-19;<br>4.5/3.1;<br>100%, ug/g  | Nd-3.1;<br>0.49/0.24;<br>88%, ug/g  |      |
| Shenyang urban dormitories (8) | Dormitories (March to May in 2014)      | -;<br>18300/14500;<br>(11)          | -;<br>447/399;<br>88%                 | -;<br>9730/5980;<br>100%            | -;<br>372/162;<br>100%              |      |
| Baoding urban dormitories (8)  | Dormitories (March to May in 2014)      | -;<br>12500/6540;<br>(11)           | -;<br>2360/2000;<br>100%              | -;<br>8230/3300;<br>100%            | -;<br>123/3703;<br>50%              |      |
| Harbin urban dormitory (18)    | Dormitories (March to May in 2014)      | -;<br>10100/6190;<br>(11)           | -;<br>1260/850;<br>100%               | -;<br>4310/2960;<br>100%            | -;<br>383/175;<br>89%               | [37] |
| Harbin urban home (15)         | Home (March to May in 2014)             | -;<br>20400/7150;<br>(11)           | -;<br>2020/1140;<br>100%              | -;<br>3790/2290;<br>100%            | -;<br>692/502;<br>93%               |      |
| Public in Harbin (18)          | Home (March to May in 2014)             | -;<br>11300/5340;<br>(11)           | -;<br>5450/1720;<br>100%              | -;<br>1410/1170;<br>100%            | -;<br>1310/195;<br>89%              |      |
| College libraries in Xining    | College libraries (Oct-Dec2017)         |                                     | 110-7719;<br>-2584;<br>100%           | 54-2336;<br>-499;<br>100%           | 43-3827;<br>-656;<br>100%           |      |
| College libraries in Lanzhou   | College libraries (Oct-Dec2017)         |                                     | 109-10153;<br>-1749;<br>100%          | 1007-39310;<br>-3046;<br>100%       | 59-9331;<br>-1801;<br>100%          |      |
| College libraries in Xi'an     | College libraries (Oct-Dec2017)         |                                     | 100.8-21782;<br>-579;<br>95.6%        | 1699-48321;<br>-6148;<br>100%       | 212-11873;<br>-2934;<br>100%        | [32] |
| College libraries in Dalian    | College libraries (Oct-Dec2017)         |                                     | Nd-2843;<br>-579;<br>95.6%            | 2547-13187;<br>-3341;<br>100%       | 400-5137;<br>-1008;<br>100%         |      |

|                                |                                                                                                       |                                |                                |                                |                                |
|--------------------------------|-------------------------------------------------------------------------------------------------------|--------------------------------|--------------------------------|--------------------------------|--------------------------------|
| College libraries in Changchun | College libraries (Oct-Dec2017)                                                                       |                                | 57-1150;<br>-/426;<br>100%     | 1003-19504;<br>-/5419;<br>100% | 100-2086;<br>-/279;<br>100%    |
| College libraries in Harbin    | College libraries (Oct-Dec2017)                                                                       |                                | 10.6-4125;<br>-/1013;<br>100%  | 617-200393;<br>-/4258;<br>100% | 53.3-3588;<br>-/357;<br>100%   |
| College libraries in Chengdu   | College libraries (Oct-Dec2017)                                                                       |                                | 546-44321;<br>-/3547;<br>100%  | 119-40599;<br>-/2378;<br>100%  | 1816-33367;<br>-/2994;<br>100% |
| College libraries in Beijing   | College libraries (Oct-Dec2017)                                                                       |                                | 3817-41263;<br>-/9758;<br>100% | 2624-30194;<br>-/4157;<br>100% | 379-3989;<br>-/1167;<br>100%   |
| College libraries in Baoding   | College libraries (Oct-Dec2017)                                                                       |                                | 596-4329;-<br>/1879;100%       | 372-33715;<br>-/5488;100%      | Nd-252;<br>-/97.2;<br>83.7%    |
| College libraries in Zhengzhou | College libraries (Oct-Dec2017)                                                                       |                                | 2217-34174;<br>-/4754;<br>100% | 1496-28647;<br>-/3319;<br>100% | 1832-15969;<br>-/2634;100%     |
| College libraries in Tsinghua  | College libraries (Oct-Dec2017)                                                                       |                                | 100-33521;<br>-/3426;<br>100%  | 279-28174;<br>-/2169;<br>100%  | 23.7-1314;<br>-/504;<br>100%   |
| College libraries in Shanghai  | College libraries (Oct-Dec2017)                                                                       |                                | 3421-68384;<br>-/7658;<br>100% | 5869-64952;<br>-/9083;<br>100% | 428-5352;<br>-/1587;<br>100%   |
| College libraries in Guangzhou | College libraries (Oct-Dec2017)                                                                       |                                | 3892-45873;-<br>/8644;<br>100% | 569-8779;-<br>/2043;<br>100%   | 483-5437;<br>-/1013;<br>100%   |
| Guangzhou (45)                 | Residential house (May 2015 to July 2017)                                                             | 1042-29900;<br>80000/4798;(8)  | 176-19511;<br>2770/712;<br>-   | 375-3847;<br>970/555;<br>-     | 27.0-1735;<br>352/131;<br>-    |
| Guangzhou (45)                 | Office (May 2015 to July 2017)                                                                        | 726-16652;<br>3935/5241;(8)    | 105-5199;<br>1158/552;<br>-    | 192-8486;<br>2607/1719;<br>-   | 57.5-1038;<br>247/192;<br>-    |
| Guangzhou (45)                 | Chemical laboratory (May 2015 to July 2017)                                                           | 1436-3179;<br>2205/2000 (8)    | 312-980;<br>629/597;<br>-      | 321-938;<br>601/546;<br>-      | 112-412;<br>214/118;<br>-      |
| Guangzhou (45)                 | Instrumental house (May 2015 to July 2017)                                                            | 8667-39312;<br>21418/23885;(8) | 824-10953;<br>4734/3733;<br>-  | 943-34662;<br>13886/6790;<br>- | 232-10747;<br>2187/980;<br>-   |
| Indoor dust in China           | Living room and bedroom include Shanghai, Beijing, Qiqihar, Nanjing, Xinjiang, Shandong and Guangzhou | 149-47400;<br>-/1120;(20)      | 39.7-45900;<br>-/298;<br>100%  | <0.8-1610;<br>-/29.8;<br>72%   | <1.1-4680;<br>-/37.6;<br>72%   |

[38]

[39]

(2010-2011)

The full names for OPEs are summarized in Table 1. -:data not available. nd: not detected.

**Table S11.** Comparison of concentrations (range; arithmetic mean/median; ng/g) of the total organophosphate esters (OPEs) and the predominant Alkyl phosphates in dust from various dust environments in China.

| Location             | TEP                        | TPP                  | TNBP                                  | TiBP                               | TBOEP                             | TEHP                                         | TBEP                          | TMP                      | Reference |
|----------------------|----------------------------|----------------------|---------------------------------------|------------------------------------|-----------------------------------|----------------------------------------------|-------------------------------|--------------------------|-----------|
| Outdoor              |                            |                      |                                       |                                    |                                   |                                              |                               |                          |           |
| Beijing road (65)    | <0.6-295;53.7/28.6;75.4%   |                      | 3.80-180;41.1/29.2 368;20.3/11. ;100% | <0.6-368;20.3/11. ;95.4%           |                                   | 1.28-19.0;5.97/5.15; 724;73.8/25.7;100%      | 3.21-724;73.8/25.7;100%       | <1-17.5;3.03/2.3 0;98.5% | [31]      |
| Tianjin (17)         | 13.5-520;101/48.7 ;100%    |                      | 10.7-53.7;24.4/20. 5;100%             | <76.5-309;97.3/77. 2;100%          | Nd-1740;683/5413600;1680/52 4;82% | 14.0-13600;1680/52 4;100%                    |                               |                          | [40]      |
| Tianjin (5)          | 14.7-76.4;29.7/18. 7;100%  |                      | <10.7-58.7;22.9/13. 7;100%            | <76.5-256;100/79.8571;220/Nd ;100% | Nd-571;220/Nd ;82%                | 16.5-125;60.3/27.8; 100%                     |                               |                          |           |
| Nanning              |                            |                      | -; 0.09/-; 100%                       | -; 0.29/-; 100%                    | -; nd/-; -                        | -; 0.002/-; 17%                              |                               |                          | [10]      |
| Henan street         | 0.20-65.7;7.33/2.9 6;100%  | 0                    | <LOD-7.11;1.50/1.0 8;90%              |                                    | <LOD-11.0;1.58/0. 59;83%          |                                              |                               | <LOD-9.09;0.89/0.1 9;50% | [33]      |
| Nanjing(urban) (8)   | 1.17-7.30; 4.56/4.43;10 0% | Nd-0.11;0.02/ Nd;25% | 0.85-6.03; 2.98/2.82;100 %            |                                    |                                   | 15.15-39.18;27.21/26 33.18;11.03/5.3 75;100% | 1.25-33.18;11.03/5.3 5;100%   | Nd; Nd/Nd; Nd            | [34]      |
| Nanjing (rural) (10) | 1.04-4.74;2.52/2.4 9; 100% | Nd-0.16;0.02/ Nd;30% | Nd-8.66; 2.23/1.33; 90%               |                                    |                                   | 1.02-5.06;2.27/1.64; 100%                    | 0.03-0.20; 2.27/1.64;100%     | Nd-2.20; 0.22/Nd;12.5 %  |           |
| Chongqing (37)       | Nd-242;- /4.92;97%         |                      | Nd-715;- /112;97%                     |                                    | Nd-11.0;- /2.27;87.9%             | Nd-12.8;- /0.88;93.9%                        |                               | Nd-105;- /1.50;51.5%     | [35]      |
| Chongqing (6)        | Nd-57.4;- /12.2;67%        |                      | Nd-757;- /477;66.7%                   |                                    | Nd-29.0;- /3.78;83.3%             | 0.60-74.0;- /6.17;100%                       |                               | Nd-56.4;- /72.1%         |           |
| Chongqing (19)       | Nd-438;- /4.47;94.7%       |                      | Nd-631;- /13.7;89.5%                  |                                    | Nd-7.15;- /2.08;84.2%             | Nd-4.77;- /0.84;78.9%                        |                               | Nd-8.48;- /1.25;84.2%    |           |
| Chongqing (28)       | Nd-35.0;- /3.95;100%       |                      | Nd-470;- /80.9;82.1%                  |                                    | Nd-43.5;- /2.79;92.9%             | Nd-12.7;- /1.02;89.3%                        |                               | Nd-26.8;- /0.50;75%      |           |
| Chengdu street (31)  |                            |                      | Nd-121;26.18/11. 2;83.9%              |                                    |                                   | Nd-489.8;61.37/26 420.3;143.13/1 ;93.5%      | 63.2-18.9;100%                |                          | [36]      |
| Indoor               |                            |                      |                                       |                                    |                                   |                                              |                               |                          |           |
| Beijing (13)         | Nd-0.95; 0.093/nd; 23%     |                      | Nd-0.57; 0.075/0.020; 77%             | Nd-0.049; 0.011/0.0089 ; 85%       |                                   | Nd-14; 1.5/0.56; 69%                         | 0.013-0.15; 0.078/0.089; 100% | Nd-0.35; 0.073/nd; 31%   | [29]      |
| Beijing (39)         | Nd-3.0; 0.34/0.17; 77%     |                      | Nd-0.30; 0.038/0.030; 82%             | Nd-0.076; 0.017/0.013; 95%         |                                   | Nd-3.3; 0.49/0.28; 74%                       | Nd-5.5; 0.35/0.11; 97%        | Nd-3.9; 0.45/nd; 46%     |           |
| Beijing (49)         | Nd-3.3; 0.50/0.089; 61%    |                      | Nd-0.88; 0.057/0.026; 78%             | Nd-0.091; 0.022/0.012; 90%         |                                   | Nd-0.98; 0.23/0.22; 67%                      | 0.0087-31; 1.8/0.14; 100%     | Nd-2.5; 0.26/nd; 35%     |           |

|                                                                      |                               |                               |                        |                                    |                               |
|----------------------------------------------------------------------|-------------------------------|-------------------------------|------------------------|------------------------------------|-------------------------------|
| Shengya<br>ng urban<br>dormitor<br>ies (8)                           | -;<br>140/116;<br>88%         | -;<br>81.1/Nd;<br>25%         | -;<br>430/291;100<br>% | -;<br>411/166;<br>50%              | -;<br>261/161;<br>100%        |
| Baoding<br>urban<br>dormitor<br>ies (8)                              | -;<br>88.9/75.9;<br>88%       | -;<br>92.9/33.2;<br>63%       | -;<br>165/Nd;<br>38%   | -;<br>730/608;<br>100%             | -;<br>181/75.6;<br>100%       |
| Harbin<br>urban<br>dormitor<br>y (18)                                | -;<br>322/213;<br>94%         | -;<br>224/68;<br>67%          | -;<br>274/1;<br>78%    | -;<br>1100/839;<br>83%             | -;<br>230/200;<br>94%         |
| Harbin<br>urban<br>home<br>(15)                                      | -;<br>316/254;<br>100%        | -;<br>487/69.8;<br>60%        | -;<br>313/129;<br>67%  | -;<br>5030/1520;8<br>7%            | -;<br>600/376;<br>87%         |
| Public in<br>Harbin<br>(18)                                          | -;<br>171/11;<br>94%          | -;<br>311/172;<br>94%         | -;<br>251/137;<br>83%  | -;<br>1410/1170;1<br>00%           | -;<br>157/142;<br>94%         |
| College<br>libraries Nd;-/7.2;0%<br>in Xining                        | Nd-237;<br>-/-27.2;<br>87.6%  | Nd-1017;<br>-/-119;<br>90.1%  |                        | 97-8317;<br>-;<br>-/-2843;<br>100% | Nd;<br>-/-6.5;<br>0%          |
| College<br>libraries Nd-371;-<br>in /54.9;87.4%                      | Nd-559;<br>-/-93.7;<br>84.6%  | 116-983;<br>-/-247;<br>100%   |                        | 100-11867;<br>-/-3664;<br>100%     | Nd-219;<br>-/-28.3;<br>87.2%  |
| Lanzhou<br>College<br>libraries Nd-224;<br>in Xi'an -/20.6;<br>85.0% | Nd-317;<br>-/-48.4;<br>89.2%  | 68.4-2184;<br>-/-216;<br>100% |                        | 547-10306;<br>-/-2839;<br>100%     | Nd-521;<br>-/-97.2;<br>92.6%  |
| College<br>libraries Nd-217;<br>in Dalian -/40.7;<br>88.5%           | Nd-317;<br>-/-48.3;<br>82.8%  | Nd-3667;<br>-/-399;<br>89.8%  |                        | 107-10549;<br>-/-2389;<br>100%     | Nd-413;<br>-/-197;<br>90.2%   |
| College<br>libraries Nd-533;<br>in -/87.4;<br>89.8%                  | Nd-376;<br>-/-99.1;<br>86.4%  | 34.3-5367;<br>-/-724;<br>100% |                        | 238-9911;<br>-/-2370;<br>100%      | 99.6-2004;<br>-/-239;<br>100% |
| Changch<br>un<br>College<br>libraries Nd-478;<br>in -/97.1;<br>87.6% | Nd-1357;<br>-/-39.5;<br>80.8% | Nd-1679;<br>-/-100;<br>90.4%  |                        | 490-7941;<br>-/-2986;<br>100%      | Nd-832;<br>-/-315;<br>98.4%   |
| College<br>libraries 54-2010;<br>in -/426;<br>100%                   | Nd-107;<br>-/-10.6;<br>81.2%  | Nd-217;<br>-/-15.9;<br>80.6%  |                        | 632-4634;<br>-/-3419;<br>100%      | Nd-1000;<br>-/-247;<br>88.5%  |
| Chengdu<br>College<br>libraries Nd-577;<br>in -/114;<br>89.3%        | Nd-167;-<br>/43.8;<br>90.6%   | Nd-2416;<br>-/-348;<br>88.5%  |                        | 1142-58176;<br>-/-8990;<br>100%    | Nd-1996;<br>-/-377;<br>94.4%  |

[37]

[32]

|                                       |                         |                        |                         |                          |                       |                            |
|---------------------------------------|-------------------------|------------------------|-------------------------|--------------------------|-----------------------|----------------------------|
| College libraries in Baoding College  | Nd-147; -/26.1; 85.2%   | Nd-241;- /65.3; 86.4%  | Nd-593;- /46.8; 90.8%   | 379-10036; -/2274; 100%  | Nd-881; -/249; 96.6%  |                            |
| College libraries in Zhengzhou        | 332-2184; -/567; 100%   | Nd-269; -/23.4; 83.8%  | 219-3267; -/713; 100%   | 327-7839;- /1012; 100%   | Nd-324;-/46.3; 84.5%  |                            |
| College libraries in Tsingtao College | Nd-463; -/29.5; 88.2%   | Nd-827; -/68.4; 81.4%  | Nd-737; -/54.9; 86.0%   | 236-19191; -/1294; 100%  | Nd-2034; -/199; 82.2% |                            |
| College libraries in Shanghai College | 212-3069; -/934; 100%   | Nd-545; -/37.7; 86.5%  | Nd-1817; -/186; 85.2%   | 112-43972; -/6899; 100%  | Nd-667; -/80.5; 81.5% |                            |
| College libraries in Guangzhou        | 428-5017; -/11773; 100% | 698-5936; -/2126; 100% | 100-1013; -/217; 100%   | 2612-30187; -/5348; 100% | Nd-546; -/20.9; 88.4% |                            |
| Guangzhou (45)                        |                         |                        | LOQ-235; 58.1/21.6; -   | LOQ-23526; 2215/88.2; -  | Nd-3122; 687/513; -   |                            |
| Guangzhou (45)                        |                         |                        | Nd-235; 38.5/26.0; -    | LOQ-266; 85.5/59.3; -    | 83.5-1442; 284/213; - |                            |
| Guangzhou (45)                        |                         |                        | 32.9-83.4; 51.2/37.3; - | LOQ-55.5; 34.3/47.5; -   | 91.3-231; 164/170; -  | [38]                       |
| Guangzhou (45)                        |                         |                        | 27.4-118; 64.8/58.7; -  | LOQ-202;88.8/61.8; -     | 30.5-926;240/145; -   |                            |
| Indoor dust in China (50)             | <4.9-236; -/13.7; 92%   | 1.71-306; -/32.2; 100% | 1.21-551; -/9.66; 100%  | <2-1200; -/45.0; 98%     | <8.1-922; -/35.5; 98% | <1.3-4.12;- /<1.3;16% [31] |

The arrangement and detailed descriptions of the matrices are in accordance with Table S13 without specification. The full names for OPEs are summarized in Table 1. -:data not available. nd: not detected.

**Table S12.** Comparison of concentrations (range; arithmetic mean/median; ng/g) of the total organophosphate esters and the predominant Aryl phosphate in dust from various dust environments in China.

| Location               | TCrP                       | CDPP                      | TMPP                 | TPHP                      | EHDPP                  | Reference |
|------------------------|----------------------------|---------------------------|----------------------|---------------------------|------------------------|-----------|
| Outdoor                |                            |                           |                      |                           |                        |           |
| Beijing road dust (65) | 1.13-2675; 61.6/7.91; 100% | 4.04-250; 33.0/19.2; 100% |                      | 2.50-1798; 103/65.4; 100% | <9-214; 22.2/10.9; 60% | [31]      |
| Tianjin (17)           |                            |                           | 146-13600; 1680/524; | 42.8-5700; 1530/1150;     | Nd-109; 35.5/27.1;     | [40]      |

|                                       |                                     |                                     |                                |                                     |                                             |      |
|---------------------------------------|-------------------------------------|-------------------------------------|--------------------------------|-------------------------------------|---------------------------------------------|------|
|                                       |                                     |                                     | 100%                           | 100%                                | 95%                                         |      |
|                                       |                                     |                                     | 41.4-4110;<br>945/237;<br>100% | 104-<br>694;348/182;100%            | 8.80-<br>77.5;30.4/21.1;95%                 |      |
|                                       |                                     |                                     | -;<br>0.004/-;<br>25%          | -;<br>0.02/-;<br>67%                |                                             | [10] |
|                                       |                                     |                                     |                                | <LOD-113;<br>15.0/7.30;<br>98%      |                                             | [33] |
| Henan street (60)                     | <LOD-32.3;<br>3.58/1.43;<br>90%     |                                     |                                | 4.37-36.57;<br>17.93/16.59;<br>100% | 0.47-6.12;<br>3.04/2.14;<br>100%            |      |
| Nanjing(urban)<br>(8)                 |                                     |                                     |                                | 0.58-7.23;<br>2.08/1.16;<br>100%    | Nd-0.34;<br>0.06/Nd;<br>20%                 | [34] |
| Nanjing (rural)<br>(10)               |                                     |                                     |                                | Nd-1400;-<br>/14.0;<br>93.9%        | Nd-13.9;-/6.10;<br>36.4%                    |      |
| Chongqing (37)                        |                                     |                                     |                                | 0.30-76.4;<br>-/7.10;<br>100%       | Nd-37.9;<br>-/7.77;<br>50%                  |      |
| Chongqing (6)                         |                                     |                                     |                                | Nd-334;<br>-/5.78;<br>84.2%         | Nd-58.2;<br>-/10.1;<br>84.2%                | [35] |
| Chongqing (19)                        |                                     |                                     |                                | Nd-268;<br>-/13.2;<br>82.1%         | Nd-234;-/8.21;89.3%<br>Nd-15.6;-/3.61;42.9% |      |
| Chongqing (28)                        |                                     |                                     |                                |                                     |                                             |      |
| Chengdu street<br>(31)                |                                     |                                     |                                | 4.9-394.6;<br>83.55/36.2;<br>100%   |                                             | [36] |
|                                       |                                     |                                     | Indoor                         |                                     |                                             |      |
|                                       |                                     |                                     |                                | 0.085-3.5;<br>0.77/0.41;<br>100%    |                                             |      |
| Beijing (13)                          | Nd-0.086;<br>0.033/0.020;<br>92%    | 0.038-4.9;<br>0.54/0.10;<br>100%    |                                | 0.067-9.2;<br>0.68/0.40;<br>100%    |                                             |      |
| Beijing (39)                          | Nd-0.41;<br>0.059/0.038;<br>97%     | 0.0032-2.2;<br>0.23/0.0089;<br>100% |                                | 0.17-2.7;<br>0.66/0.61;<br>100%     |                                             | [29] |
| Beijing (49)                          | 0.0082-0.54;<br>0.072/0.05;<br>100% | 0.0091-0.54;<br>0.15/0.11;<br>100%  |                                |                                     |                                             |      |
| Shengyang<br>urban<br>dormitories (8) |                                     |                                     |                                | -;<br>2140/1240;<br>100%            | -;<br>441/171;<br>100%                      |      |
| Baoding urban<br>dormitories (8)      |                                     |                                     |                                | -;<br>280/182;<br>100%              | -;<br>179/148;<br>100%                      | [37] |
| Harbin urban<br>dormitory (18)        |                                     |                                     |                                | -;<br>1720/583;<br>100%             | -;<br>188/183;<br>100%                      |      |

|                                |                               |                               |                             |      |
|--------------------------------|-------------------------------|-------------------------------|-----------------------------|------|
| Harbin urban home (15)         |                               | -;<br>6180/605;<br>100%       | -;<br>902/257;<br>100%      |      |
| Public in Harbin (18)          |                               | -;<br>617/372;<br>100%        | -;<br>166/134;<br>100%      |      |
| College libraries in Xining    |                               | 110-4369;<br>-/1037;<br>10%   | Nd;<br>-/4.1;<br>0%         |      |
| College libraries in Lanzhou   |                               | 100-11867;<br>-/3664;<br>100% | Nd-324;<br>-/41.1;<br>92.5% |      |
| College libraries in Xi'an     |                               | 341-1331;<br>-/645;<br>100%   | Nd-1111;<br>-/232;<br>90.8% |      |
| College libraries in Dalian    |                               | 400-8643;<br>-/1542;<br>100%  | Nd-579;<br>-/131;<br>88.6%  |      |
| College libraries in Changchun |                               | 154-9789;<br>-/1419;<br>100%  | 200-3671;<br>-/749;<br>100% |      |
| College libraries in Harbin    |                               | 103-31841;<br>-/3019;<br>100% | Nd-1783;<br>-/336;<br>92.8% |      |
| College libraries in Chengdu   |                               | 712-31841;<br>-/3019;<br>100% | Nd-1783;<br>-/336;<br>92.8% | [32] |
| College libraries in Beijing   |                               | 419-3210;<br>-/988;<br>100%   | Nd-2128;<br>-/454;<br>88.5% |      |
| College libraries in Baoding   |                               | 300-4386;<br>-/1138;<br>100%  | 43.6-257;<br>-/116;<br>100% |      |
| College libraries in Zhengzhou |                               | 274-5487;<br>-/869;<br>100%   | Nd-923<br>-/101;<br>92.5%   |      |
| College libraries in Tsingtao  |                               | 18.9-3481;<br>-/646;<br>100%  | nd-1718;<br>-/238;<br>80.8% |      |
| College libraries in Shanghai  |                               | 58.6-8987;<br>-/2348;<br>100% | Nd-525;<br>-/97.3;<br>90.6% |      |
| College libraries in Guangzhou |                               | 462-20187;<br>-/1913;<br>100% | Nd-984;<br>-/68.3;<br>92.8% |      |
| Guangzhou (45)                 | 7.24-98.1;<br>45.2/43.7;<br>- | 114-1849;<br>903/906;<br>-    |                             |      |
| Guangzhou (45)                 | 8.98-260;<br>77.5/61.4;<br>-  | 120-1715;<br>744/647;<br>-    |                             | [38] |
| Guangzhou (45)                 | 34.4-116;                     | 204-734;                      |                             |      |



|                              |                                                 |                                              |                              |      |
|------------------------------|-------------------------------------------------|----------------------------------------------|------------------------------|------|
|                              | 82.1/99.7;<br>-<br>29.6-4948;<br>927/57.3;<br>- | 429/347;<br>-<br>200-9779;<br>1758/836;<br>- |                              |      |
| Guangzhou (45)               |                                                 |                                              |                              |      |
| Indoor dust in<br>China (50) | 1.75-116;<br>-/13.9;<br>100%                    | 3.52-7620;<br>-/109;<br>100%                 | 1.26-361;<br>-/14.7;<br>100% | [31] |

The arrangement and detailed descriptions of the matrices are in accordance with Table S13 without specification. The full names for OPEs are summarized in Table 1. -:data not available. nd: not detected.

**Table S13.** Comparison of concentrations (range; arithmetic mean/median; ng/g) of the total organophosphate esters and the predominant chloroalkyl phosphates in soil from various soil environments in China.

| Location            | Description of matrix (sample year)                                       | ΣOPEs (the total number)         | TCEP                              | TCIPP                             | TDCPP                             | Reference |
|---------------------|---------------------------------------------------------------------------|----------------------------------|-----------------------------------|-----------------------------------|-----------------------------------|-----------|
| China               | Provincial-level administrative away from the point sources (May-Jul2018) | 1.70-179;<br>17.5/9.72<br>(12)   | 0.46-11.8;<br>2.29/1.77;<br>100%  | Nd-167;<br>6.62/1.67;<br>57%      | Nd-1.87;<br>0.24/0.13;<br>79%     | [41]      |
| Hebei Province      | Plastic waste recycling in northern China                                 | 38-1250;<br>398/-;<br>(9)        | 7-436;<br>92/-;<br>90%            | 4-52;<br>21/-;<br>79%             | -;<br>-<br>-                      | [42]      |
| Tianjin (17)        | Open recycling sites for outdoor recycling areas                          | 122-2100;<br>829/696;<br>(12)    | <3.44-548;<br>114/50.3;<br>100%   | 34.9-1370;<br>444/378;<br>100%    | 1.71-177;<br>42.1/23.6;<br>100%   |           |
| Tianjin (7)         | Semi-closed recycling sites for workshop areas                            | 58.5-316;<br>138/116;<br>(12)    | <3.44-23.0;<br>8.52/6.39;<br>100% | 5.39-176;<br>55.7/29.1;<br>100%   | <0.31-13.7;<br>3.78/2.32;<br>100% | [40]      |
| Tianjin (12)        | Farmland around the waste recycling sites                                 | 37.7-156;<br>65.2/56.3;<br>(12)  | 1.72-3.79;<br>2.03/1.72;<br>100%  | <2.48-16.8;<br>8.86/8.58;<br>100% | <0.31-28.3;<br>3.89/1.05;<br>100% |           |
| Nanning             | Forest soil                                                               | -;<br>0.84±0.45/-;<br>(11)       | -;<br>0.11/-;<br>83%              | -;<br>0.58/-;<br>100%             | -;<br>0.007/-;<br>8%              | [10]      |
|                     | Paddy soil                                                                | -;<br>2.1±1.4/-;<br>(11)         | -;<br>0.13/-;<br>83%              | -;<br>1.04/-;<br>100%             | -;<br>0.06/-;<br>25%              |           |
| Hebei Hengshui (19) | Near the Manufacturing plant (Dec 2016)                                   | Nd-14000;<br>1100/320<br>(ng/kg) | Nd-8600;<br>580/93<br>(ng/kg)     | Nd-5300;<br>530/220<br>(ng/kg)    |                                   | [17]      |
| Central China (31)  |                                                                           |                                  | 0.33-50.6;<br>-/2.93;             | 0.33-400;<br>-/15.1;<br>-         | <0.05-65.7;<br>-/1.24;<br>-       |           |
| East/south of China | The urban and rural areas (Mar-Aug2017)                                   |                                  | <0.04-137;<br>-/4.22;<br>-        | 0.82-401;<br>-/38.2;<br>-         | <0.05-15.7;<br>-/1.48;<br>-       | [43]      |
| Northeast of China  |                                                                           |                                  | <0.04-56.0;<br>-/2.85;<br>-       | 3.79-157;<br>-/69.1;<br>-         | <0.05-11.6;<br>-/2.13;<br>-       |           |

|                                               |                                                             |                                    |                                      |                                       |                                       |      |
|-----------------------------------------------|-------------------------------------------------------------|------------------------------------|--------------------------------------|---------------------------------------|---------------------------------------|------|
| West of China                                 |                                                             |                                    | <0.04-182;<br>-/1.87;<br>-           | <0.12-202;<br>-/9.37;<br>-            | <0.05-17.7;<br>-/1.28;<br>-           |      |
| Farmland of Three Gorges Reservoir (TGR) (32) | Upper reach of the TGR in Chongqing Municipality (Jul 2016) | 52.1-680;<br>266/247;<br>(12)      | Nd-3.80;<br>1.24/1.12;<br>75%        | Nd-19.7;<br>6.89/5.19;<br>93.8%       | Nd-7.53;<br>0.26/0.05;<br>9.37%       | [44] |
| Riparian of Three Gorges Reservoir (TGR) (26) | Upper reach of the TGR in Chongqing Municipality (Jul 2016) | 156-1428;<br>499/365;<br>(12)      | Nd-16.1;<br>2.33/2.03;<br>92.3%      | 2.74-130;<br>13.3/7.2;<br>100%        | Nd-3.45;<br>0.24/0.05;<br>30.7%       |      |
| Chongqing (14)                                | Industrial area (Apr-May2017)                               | 25.8-98.3;<br>55.5/-;<br>(12)      | 0.29-1.63;<br>0.94/-;<br>100%        | 2.24-16.3;<br>7.34/-;<br>100%         | 0.39-3.04;<br>1.31/-;<br>100%         |      |
| Chongqing (12)                                | Residential area (Apr-May2017)                              | 21.5-108;<br>55.6/-;<br>(12)       | 0.51-5.43;<br>2.18/-;<br>100%        | 4.68-38.2;<br>17.6/-;<br>100%         | 0.38-2.37;<br>0.86/-;<br>100%         | [45] |
| Chongqing (15)                                | Commercial area (Apr-May2017)                               | 17.7-69.1;<br>41.8/-;<br>(12)      | Nd-1.17;<br>0.60/-;<br>92.9%         | 0.75-25.8;<br>9.08/-;<br>100%         | Nd-4.59;<br>1.99/-;<br>85.7%          |      |
| Chongqing (15)                                | City park area (Apr-May2017)                                | 10.7-70.5;<br>34.0/-;<br>(12)      | Nd-0.51;<br>0.29/-;<br>93.3%         | 1.75-21.4;<br>7.82/-;<br>100%         | 0.74-12.9;<br>2.74/-;<br>100%         |      |
| Guangzhou (11)                                | Park area (Dec 2011)                                        | 0.041-0.15;<br>0.001/0.001<br>(11) | 0.003-0.008;<br>0.004/0.004;<br>100% | 0.0002-0.003;<br>0.002/0.001;<br>100% | 0.002-0.015;<br>0.007/0.005;<br>100%  |      |
| Guangzhou (13)                                | Paddy/vegetable fields (Dec 2011)                           | 0.063-0.25;<br>0.12/0.11           | Nd-0.047;<br>0.006/0.003;<br>53.8%   | Nd-0.001;<br>0.0001/0.0002;<br>50.7%  | Nd-0.011;<br>0.002/0.003;<br>38.5%    |      |
| Guangzhou (12)                                | Commercial areas (Dec 2011)                                 | 0.25-1.37;<br>0.46/0.38;<br>(11)   | 0.030-0.140;<br>0.093/0.093;<br>100% | 0.001-0.016;<br>0.006/0.003;<br>100%  | 0.005-0.091;<br>0.034/0.024;<br>100%, | [46] |
| Guangzhou (16)                                | Road greenbelts (Dec 2011)                                  | 0.18-0.51;<br>0.34/0.31;<br>(11)   | 0.012-0.078;<br>0.041/0.038;<br>100% | 0.0002-0.005;<br>0.002/0.003;<br>100% | 0.005-0.035;<br>0.015/0.014;<br>100%  |      |
| Guangzhou (15)                                | Residential areas (Dec 2011)                                | 0.11-0.50;<br>0.23/0.18;<br>(11)   | Nd-0.11;<br>0.018/0.007;<br>73.3%    | Nd-0.014;<br>0.002/0.001;<br>73.3%    | Nd-0.050;<br>0.014/0.012;<br>86.6%    |      |

The full names for OPEs are summarized in Table 1. -:data not available. nd: not detected.

**Table S14.** Comparison of concentrations (range; arithmetic mean/median; ng/g) of the total organophosphate esters (OPEs) and the predominant Alkyl phosphate in soil from various soil environments in China.

| Location                             | TEP                           | TPP                                   | TNBP                          | TMP                            | TBOEP                         | TEHP                          | TBEP | TiBP | Reference |
|--------------------------------------|-------------------------------|---------------------------------------|-------------------------------|--------------------------------|-------------------------------|-------------------------------|------|------|-----------|
| China                                |                               |                                       |                               |                                |                               |                               |      |      |           |
| Provincial-level administrative away | Nd-13.5;<br>0.75/0.13;<br>62% | Nd-0.03;<br>0.002/0.001;<br>1;<br>70% | Nd-9.97;<br>1.01/0.61;<br>94% | Nd-1.50;<br>0.03/0.003;<br>20% | Nd-12.8;<br>3.41/2.76;<br>86% | Nd-4.01;<br>0.62/0.36;<br>97% |      |      | [41]      |

|                                      |                                      |                                  |                                 |                                  |                                     |                          |                                                                                                                                                            |      |  |  |
|--------------------------------------|--------------------------------------|----------------------------------|---------------------------------|----------------------------------|-------------------------------------|--------------------------|------------------------------------------------------------------------------------------------------------------------------------------------------------|------|--|--|
| from the point sources (May-Jul2018) |                                      |                                  |                                 |                                  |                                     |                          |                                                                                                                                                            |      |  |  |
| Hebei provision                      |                                      | -;<br>22/-;<br>>60%              |                                 |                                  |                                     | 20-592;<br>200/-;<br>90% | -;<br>47/-;<br>-<br>2.05-<br>9.56;<br>4.49/4.8<br>9;<br>100%<br>4.60-<br>7.09;<br>5.43/5.0<br>3;<br>-<br>100%<br><4.10-<br>4.59;<br>2.45/2.0<br>5;<br>100% | [42] |  |  |
| Tianjin (17)                         | Nd-13.8;<br>4.63/3.47;<br>94%        | Nd-3.97;<br>1.14/1.09;<br>75%    |                                 | 25.9-306;<br>62.0/47.3;<br>100%  | 0.54-18.5;<br>4.51/2.87;<br>100%    |                          |                                                                                                                                                            |      |  |  |
| Tianjin (7)                          | <0.84-<br>1.34;<br>0.55/0.42;<br>94% | Nd-2.17;<br>0.78/1.09;<br>75%    |                                 | 30.5-72.3;<br>44.0/36.2;<br>100% | 0.93-12.0;<br>3.33/1.78;<br>100%    |                          |                                                                                                                                                            | [40] |  |  |
| Tianjin (12)                         | Nd-0.42;<br>0.38/0.42;<br>94%        | <2.18-4.68;<br>3.07/3.05;<br>75% |                                 | 21.1-59.9;<br>29.2/28.1;<br>100% | 1.26-45.7;<br>5.62/1.61;<br>100%    |                          |                                                                                                                                                            |      |  |  |
| Nanning                              |                                      | -;<br>0.03/-;<br>75%             |                                 | -;<br>0.01/-;<br>17%             | -;<br>0.03/-;<br>25%                |                          | -;<br>0.02/-;<br>100%                                                                                                                                      | [10] |  |  |
|                                      |                                      | -;<br>0.06/-;<br>83%             |                                 | -;<br>0.10/-;<br>50%             | -;<br>0.31/-;<br>75%                |                          | -;<br>0.06/-;<br>100%                                                                                                                                      |      |  |  |
| Hebei Hengshui (19)                  |                                      |                                  |                                 |                                  |                                     |                          |                                                                                                                                                            |      |  |  |
| Central of China                     | <0.06-<br>11.3;<br>-/<br>0.06        | 0.29-17.6;<br>-/<br>3.06;<br>-   | <0.02-5.94;<br>-/<br>0.02;<br>- | <0.09-12.7;<br>-/<br>0.33;<br>-  | <0.10-<br>18.1;<br>-/<br>0.35;<br>- |                          |                                                                                                                                                            |      |  |  |
| East/south of China                  | <0.06-<br>18.4;<br>-/<br>0.06;<br>-  | <0.05-10.9;<br>-/<br>3.05;<br>-  | <0.02-4.35;<br>-/<br>0.02;<br>- | <0.09-2.00;<br>-/<br>0.36;<br>-  | <0.10-<br>8.28;<br>-/<br>0.50;<br>- |                          |                                                                                                                                                            | [43] |  |  |
| Northeast of China                   | <0.06-<br>7.65;<br>-/<br>0.06;<br>-  | 1.10-3.83;<br>-/<br>2.96;<br>-   | <0.02;<br>-/<br>-;<br>-         | <0.09-1.64;<br>-/<br>0.40;<br>-  | <0.10-<br>2.14;<br>-/<br>2.85;<br>- |                          |                                                                                                                                                            |      |  |  |
| West of China                        | <0.06-<br>32.0;<br>-/<br>0.48;<br>-  | 0.45-14.6;<br>-/<br>1.56;<br>-   | <0.02;<br>-/<br>-;<br>-         | <0.09-1.31;<br>-/<br>0.35;<br>-  | <0.10-<br>5.22;<br>-/<br>0.73;<br>- |                          |                                                                                                                                                            |      |  |  |
| Farmland of Three                    | Nd-1.11;<br>0.16/0.08;               | Nd-24.4;<br>3.53/2.44;           | Nd-0.38;<br>0.08/0.03;          |                                  | Nd-41.6;<br>7.49/4.42;              | Nd-0.556;                |                                                                                                                                                            | [44] |  |  |

|                                               |                                 |                         |                                |                               |                                |                                |                           |
|-----------------------------------------------|---------------------------------|-------------------------|--------------------------------|-------------------------------|--------------------------------|--------------------------------|---------------------------|
| Gorges Reservoir (TGR) (32)                   | 56.3%                           |                         | 96.8%                          | 56.3%                         |                                | 78.1%                          | 0.06/0.10;15.6%           |
| Riparian of Three Gorges Reservoir (TGR) (32) | Nd-0.565; 0.11/0.01; 50%        |                         | 0.520-112; 9.16/2.82; 100%     | Nd-0.403; 0.12/0.09; 92.3%    |                                | Nd-19.4; 6.12/4.48; 88.5%      | Nd-1.79; 0.27/0.10; 30.7% |
| Residentin Chongqing (12)                     | Nd-9.17; 5.92/-; 41.7%          | 2.36-55.8;9.92/-; 100%  |                                | 3.93-5.03; 4.43/-; 100%       |                                | Nd-2.06; 0.54/-; 83.3%         | Nd-3.65; 1.79/-; 25%      |
| Industrial area in Chongqing (15)             | Nd-5.57; 3.05/-; 40.0%          | 4.31-29.3; 10.7/-; 100% |                                | 2.03-7.04; 4.34/-; 100%       |                                | 0.36-0.98; 0.61/-; 100%        | Nd-1.54; 0.94/-; 33.3%    |
| Commercial area in Chongqing (14)             | Nd-7.84; 2.14/-; 21.4%          | 0.68-5.68; 3.25/-; 100% |                                | 0.69-4.48; 3.06/-; 100%       |                                | 0.19-7.68; 2.70/-; 100%        | Nd-3.11; 1.14/-; 33.3%    |
| City park area in Chongqing (15)              | Nd-3.54; 0.77/-; 33.3%          | 0.85-3.71; 2.02/-; 100% |                                | 1.16-3.77; 2.48/-; 100%       |                                | Nd-0.58; 0.28/-; 80%           | Nd-1.29; 0.54/-; 26.7%    |
| Park area in Guangzhou (11)                   | 0.004-0.011; 0.006/0.005; 100%  |                         | 0.002-0.023; 0.009/0.010; 100% | Nd-0.002; 0.0002/0.001; 18.2% | 0.013-0.067; 0.046/0.054; 100% | 0.001-0.007; 0.002/0.001; 100% |                           |
| Paddy/vegetable fields in Guangzhou (13)      | 0.001-0.007; 0.004/0.004; 100%, |                         | 0.002-0.025; 0.015/0.014; 100% | Nd-0.005; 0.001/0.002; 38.5%  | 0.017-0.114; 0.069/0.068; 100% | Nd-0.015; 0.004/0.003; 61.5%   |                           |
| Commercial areas in Guangzhou (12)            | 0.002-0.009; 0.006/0.005; 100%  |                         | 0.010-0.21; 0.044/0.027; 100%, | Nd-0.001; 0.0002/0.0004; 25%  | 0.064-0.52; 0.15/0.12; 100%    | 0.004-0.029; 0.017/0.014; 100% |                           |
| Road greenbelts in Guangzhou (16)             | 0.001-0.008; 0.004/0.004; 100%  |                         | 0.012-0.057; 0.029/0.024; 100% | Nd-0.001; 0.0001/0.001; 18.8% | 0.049-0.25; 0.12/0.11; 100%    | 0.001-0.006; 0.004/0.004; 100% |                           |
| Residential areas in Guangzhou (15)           | 0.001-0.006; 0.003/0.002; 100%  |                         | 0.0120-0.046; 0.027/0.026;100% | Nd-0.001; 0.0002/0.0002;33.3% | 0.041-0.15; 0.094/0.092;100%   | 0.001-0.039; 0.006/0.002; 100% |                           |

[45]

[46]

The arrangement and detailed descriptions of the matrices are in accordance with Table S7 without specification. The full names for OPEs are summarized in Table 1. -:data not available. nd: not detected.

**Table S15.** Comparison of concentrations (range; arithmetic mean/median; ng/g) of the total organophosphate esters and the predominant Aryl phosphate in soil from various soil environments in China.

| Location                                                                  | TCrP                         | CDPP | TMPP                             | TPHP                             | EHDPP                             | Reference |
|---------------------------------------------------------------------------|------------------------------|------|----------------------------------|----------------------------------|-----------------------------------|-----------|
| China                                                                     |                              |      |                                  |                                  |                                   |           |
| Provincial-level administrative away from the point sources (May-Jul2018) | Nd-115;<br>2.23/0.58;<br>52% |      | Nd-3.48;<br>0.13/0.04;<br>79%    |                                  | Nd-1.23;<br>0.16/0.13;<br>94%     | [41]      |
| Hebei provision                                                           |                              |      |                                  | -;<br>26/-;<br>>60%              | -;<br>11/-;<br>>60%               | [42]      |
| Tianjin (17)                                                              |                              |      | 3.03-185;<br>49.8/46.3;<br>100%  | 9.68-303;<br>100/86.9;<br>100%   | <0.35-4.35;<br>1.75/1.36;<br>100% |           |
| Tianjin (7)                                                               |                              |      | 0.10-5.99;<br>2.09/1.84;<br>100% | 1.43-48.4;<br>14.2/7.02;<br>100% | 0.17-0.81;<br>0.40/0.18;<br>100%  | [40]      |
| Tianjin (12)                                                              |                              |      | 0.87-36.6;<br>5.08/2.12;<br>100% | 0.53-8.33;<br>3.00/2.93;<br>100% | 1.12-45.7;<br>5.62/1.23;<br>100%  |           |
| Nanning                                                                   |                              |      | -;<br>0.003/-;<br>17%            | -;<br>0.03/-;<br>17%             |                                   | [10]      |
| Hebei Heng Shui                                                           |                              |      | -;<br>0.11/-;<br>67%             | -;<br>0.13/-;<br>67%             |                                   |           |
| Central of China                                                          |                              |      |                                  | Nd-310;<br>38/23<br>-            |                                   | [17]      |
| East/south of China                                                       |                              |      | 0.05-4.91;<br>-/0.22;<br>-       | <0.02-1.70;<br>-/0.05;<br>-      | <0.02-1.11;<br>-/0.15;<br>-       |           |
| Northeast of China                                                        |                              |      | <0.02-5.66;<br>-/0.29;<br>-      | <0.02-3.69;<br>-/0.19;<br>-      | <0.02-1.29;<br>-/0.16;<br>-       | [43]      |
| West of China                                                             |                              |      | 0.33-1.36;<br>-/0.68;<br>-       | 0.22-1.45;<br>-/0.44;<br>-       | 0.09-0.65;<br>-/0.20;<br>-        |           |
| Farmland of Three Gorges Reservoir (TGR) (32)                             |                              |      | <0.02-2.66;<br>-/0.30;<br>-      | <0.02-1.96;<br>-/0.29;<br>-      | <0.02-0.65;<br>-/0.22;<br>-       |           |
| Riparian of Three Gorges Reservoir (TGR) (32)                             |                              |      | 49.9-398;<br>196/170;<br>100%    | Nd-1.96;<br>0.23/0.10;<br>18.8%  | Nd-247;<br>49.2/35.4;<br>96.9%    | [44]      |
|                                                                           |                              |      | 98.9-1371;<br>408/249;<br>100%   | Nd-5.54;<br>0.76/0.10;<br>30.7%  | 15.9-126;<br>57.2/48.2;<br>100%   |           |

|                                                    |                                     |                                       |                                      |  |  |  |      |
|----------------------------------------------------|-------------------------------------|---------------------------------------|--------------------------------------|--|--|--|------|
| Residential<br>Chongqing (12)                      |                                     |                                       | Nd-19.1;<br>8.06/-;<br>91.7%         |  |  |  |      |
| Industrial area<br>in Chongqing<br>(15)            |                                     |                                       | 1.19-9.96;<br>3.89/-;<br>10%         |  |  |  | [45] |
| Commercial<br>area in<br>Chongqing (14)            |                                     |                                       | 1.13-18.1;<br>9.86/-;<br>100%        |  |  |  |      |
| City park in<br>Chongqing (15)                     |                                     |                                       | Nd-33.6;<br>8.60/-;<br>93.3%         |  |  |  |      |
| Park area in<br>Guangzhou<br>(11)                  | Nd-0.019;<br>0.006/0.012;<br>45.5%  | 0.0004-0.004;<br>0.002/0.002;<br>100% | 0.002-0.009;<br>0.005/0.004;<br>100% |  |  |  |      |
| Paddy/vegetab<br>le fields in<br>Guangzhou<br>(13) | Nd-0.048;<br>0.014/0.013;<br>76.9%  | 0.001-0.005;<br>0.002/0.001;<br>100%  | Nd-0.022;<br>0.005/0.003;<br>84.6%   |  |  |  |      |
| Commercial<br>areas in<br>Guangzhou<br>(12)        | 0.009-0.45;<br>0.071/0.028;<br>100% | 0.005-0.046;<br>0.023/0.021;<br>100%  | 0.006-0.040;<br>0.020/0.018;<br>100% |  |  |  | [46] |
| Road<br>greenbelts in<br>Guangzhou<br>(16)         | 0.048-0.17;<br>0.10/0.096;<br>100%  | 0.004-0.014;<br>0.008/0.007;<br>100%  | 0.004-0.039;<br>0.020/0.020;<br>100% |  |  |  |      |
| Residential<br>areas in<br>Guangzhou<br>(15)       | 0.020-0.11;<br>0.051/0.046;<br>100% | 0.002-0.009;<br>0.004/0.004;<br>100%  | 0.001-0.040;<br>0.009/0.006;<br>100% |  |  |  |      |

The arrangement and detailed descriptions of the matrices are in accordance with Table S7 without specification. The full names for OPEs are summarized in Table 1. -:data not available. nd: not detected.

**Table S16.** Comparison of concentrations (range; arithmetic mean/median; ng/g ww) of the total organophosphate esters and the predominant chloroalkyl phosphates in biota in China.

| Location            | Description of matrix (sample year)     | Biota                | ΣOPEs (the total number)      | TCEP                     | TCIPP                    | TDCPP       | Reference |
|---------------------|-----------------------------------------|----------------------|-------------------------------|--------------------------|--------------------------|-------------|-----------|
| Hebei Heng Shui (8) | near the Manufacturing plant (Dec 2016) | Tree bark(lipid);    | 5300-19000;<br>12000/11000;   | 4200-9100;<br>6700/4900; | 1800-8900;<br>7500/5700- |             | [17]      |
| Pearl River Delta   | Southern China                          | Fish (lipid weight ) |                               | 82.7-4692;-/-            | 62.7-883;-/-             | Nd-251;-/-  | [47]      |
|                     | Qingyuan County                         | Bird (liquid)        |                               | 33.7-162;-/-             | 3.89-21.4;-/-            | Nd-43.7;-/- |           |
| Beibu Gulf          | Culture ponds; estuaries                | Seafood organisms    | 5.13-39.6;<br>14.6/-;<br>(11) |                          |                          |             | [12]      |
|                     |                                         | shrimps              | -;12.5/-<br>(11)              |                          |                          |             |           |

|                                                |                               |                   |             |           |           |      |
|------------------------------------------------|-------------------------------|-------------------|-------------|-----------|-----------|------|
| South China<br>Qingyuan <sup>a</sup>           | crabs                         | -;20.4/-;<br>(11) |             |           |           |      |
|                                                | oysters                       | -;8.90/-;<br>(11) |             |           |           |      |
|                                                | Water snake (7)               | 1.9±1.2           | 0.046±0.032 | 0.31±0.17 | 0.32±0.78 |      |
|                                                | Snake egg (3)                 | 12±2.3            | 0.16±0.045  | 0.96±0.18 | 0.29±0.51 | [48] |
|                                                | Common carp<br>(6)            | 14±2.4            | 0.21±0.10   | 3.1±0.48  | 0.24±0.21 |      |
| Beijing <sup>a</sup>                           | Topmouth<br>gudgeon           |                   | 166.88      | 124.5     | 22.976    |      |
|                                                | Crucian carp                  |                   | 105.72      | 117.75    | 13.57     | [49] |
|                                                | Loach                         |                   | 205.53      | 144.2     | 32.92     |      |
|                                                | Dragonfly                     |                   | 0.975       | 1.815     |           |      |
|                                                | Grasshopper                   |                   | 0.545       | 0.705     |           |      |
| Longtang<br>Guangdong<br>province <sup>a</sup> | Cricket adult                 |                   | 1.46        | 3.50      |           |      |
|                                                | Mole-cricket<br>adult         |                   | 0.91        | 2.22      |           |      |
|                                                | Aquatic<br>stinkbug adult     |                   | 0.39        | 0.97      |           |      |
|                                                | Terrestrial<br>stinkbug adult |                   | 0.28        | 0.36      |           | [50] |
|                                                | Terrestrial<br>beetle adult   |                   | 0.49        | 1.09      |           |      |
|                                                | Aquatic beetle<br>adult       |                   | 0.30        | 1.66      |           |      |
|                                                | Moth                          |                   | 1.54        | 6.99      |           |      |
|                                                |                               |                   |             |           |           |      |
|                                                |                               |                   |             |           |           |      |

The full names for OPEs are summarized in Table 1. a: only the mean concentration. -: data not available. nd: not detected.

**Table S17.** Comparison of concentrations (range; arithmetic mean/median; ng/g ww) of the total organophosphate esters (OPEs) and the predominant Alkyl phosphates in biota in China.

| Location                                       | TEP       | TNBP      | TMP | TBOEP  | TEHP        | Reference |
|------------------------------------------------|-----------|-----------|-----|--------|-------------|-----------|
| South China,<br>Qingyuan                       | 0.24±0.21 | 0.79±0.81 |     |        | 0.014±0.011 |           |
|                                                | 1.0±0.57  | 7.7±1.4   |     |        | 0.11±0.088  | [48]      |
|                                                | 0.96±0.40 | 3.0±1.4   |     |        | 0.13±0.045  |           |
| Fish                                           | Nd        | 43.9-2946 | Nd  |        | Nd-3.61     |           |
| Bird                                           | Nd        | 11.7-281  | Nd  |        | Nd-13.9     | [47]      |
| Beijing                                        |           | 184.08    |     | 20.586 | 115.44      |           |
|                                                |           | 228.78    |     | 16.6   | 140.18      | [49]      |
|                                                |           | 241.82    |     | 24.09  | 85.67       |           |
|                                                |           |           |     |        | 21.35       |           |
|                                                |           |           |     |        | 1.07        |           |
| Longtang<br>Guangdong<br>province <sup>a</sup> |           |           |     |        | <LOQ        |           |
|                                                |           |           |     |        | <LOQ        |           |
|                                                |           |           |     |        | 1.09        | [50]      |
|                                                |           |           |     |        | 15.8        |           |
|                                                |           |           |     |        | <LOQ        |           |
|                                                |           |           |     |        | <LOQ        |           |
|                                                |           |           |     |        | 3.35        |           |

The arrangement and detailed descriptions of the matrices are in accordance with Table S16 without specification. a: only the mean concentration. The full names for OPEs are summarized in Table 1. -:data not available. nd: not detected.

**Table S18.** Comparison of concentrations (range, arithmetic mean ng/g ww) of the total organophosphate esters(OPEs) and the predominant Aryl phosphates in biota in China.

| Location            | TCrp | CDPP | TMPP | TPHP           | EHDPP     | Reference |
|---------------------|------|------|------|----------------|-----------|-----------|
| Hebei Heng Shui (8) |      |      |      | Nd-2.3;1.2/1.2 |           | [17]      |
|                     |      |      |      | -              |           |           |
| South China,        |      |      |      | 0.23±0.11      | Nd        |           |
| Qingyuan            |      |      |      | 1.6±1.7        | 0.61±0.80 | [48]      |
|                     |      |      |      | 6.2±1.8        | 0.24±0.32 |           |
|                     |      |      |      | 34.26          | 20.68     |           |
| Beijing             |      |      |      | 56.55          | 21.67     | [49]      |
|                     |      |      |      | 59.89          | 33.37     |           |
|                     |      |      |      | 12.515         | 0.09      |           |
|                     |      |      |      | 0.585          | <LOQ      |           |
|                     |      |      |      | 0.26           | 0.22      |           |
| Long tang           |      |      |      | 3.12           | <LOQ      |           |
| Guangdong           |      |      |      | 0.17           | <LOQ      | [50]      |
| province            |      |      |      | 0.28           | 0.69      |           |
|                     |      |      |      | <LOQ           | <LOQ      |           |
|                     |      |      |      | 0.12           | <LOQ      |           |
|                     |      |      |      | 0.86           | 0.25      |           |

The arrangement and detailed descriptions of the matrices are in accordance with Table S16 without specification. The full names for OPEs are summarized in Table 1. a: only the mean concentration. -:data not available. nd: not detected.

## References:

1. Zhang, Z.; Shao, H.; Wu, M.; Zhang, J.; Li, D.; Li, J.; Wang, H.; Shi, W.; Xu, G. Occurrence, Distribution, and Potential Sources of Organophosphate Esters in Urban and Rural Surface Water in Shanghai, China. *Arch Environ Con Tox* **2019**, *77*, 115–126, doi:10.1007/s00244-019-00633-w.
2. Shi, Y.; Gao, L.; Li, W.; Wang, Y.; Liu, J.; Cai, Y. Occurrence, distribution and seasonal variation of organophosphate flame retardants and plasticizers in urban surface water in Beijing, China. *Environ Pollut* **2016**, *209*, 1–10, doi:10.1016/j.envpol.2015.11.008.
3. Wu D, Yin H, Li S, Wang Z, Deng X, Luo Y, Luo L. Pollution Characteristics of OPEs in the Surface Water and Sediment of Jinjiang River in Chengdu City. *Environ. Chem.* 2018, *40*, 1245–1251 (in Chinese)..
4. Liu, J., He, L., Zeng, X., Yu, Z., Ran, Y., Sheng, G., Fu, J., Occurrence and Distribution of Organophosphorus Flame Retardants/Plasticizer in Surface Sediments from the Pearl River and Dongjiang River. *Asian Journal of Ecotoxicology*. **2016**, *11*, 436–443 (in Chinese).
5. Xing, L.; Tao, M.; Zhang, Q.; Kong, M.; Sun, J.; Jia, S.; Liu, C. Occurrence, spatial distribution and risk assessment of organophosphate esters in surface water from the lower Yangtze River Basin. *Sci Total Environ* **2020**, *734*, 139380, doi:10.1016/j.scitotenv.2020.139380.
6. Xing, L.; Zhang, Q.; Sun, X.; Zhu, H.; Zhang, S.; Xu, H. Occurrence, distribution and risk assessment of organophosphate esters in surface water and sediment from a shallow freshwater Lake, China. *Sci Total Environ* **2018**, *636*, 632–640, doi:10.1016/j.scitotenv.2018.04.320.
7. Liu, Y.; Song, N.; Guo, R.; Xu, H.; Zhang, Q.; Han, Z.; Feng, M.; Li, D.; Zhang, S.; Chen, J. Occurrence and partitioning behavior of organophosphate esters in surface water and sediment of a shallow Chinese freshwater lake (Taihu Lake): Implication for eco-toxicity risk. *Chemosphere* **2018**, *202*, 255–263, doi:10.1016/j.chemosphere.2018.03.108.
8. Wang, X.; Zhu, L.; Zhong, W.; Yang, L. Partition and source identification of organophosphate esters in the water and sediment of Taihu Lake, China. *J Hazard Mater* **2018**, *360*, 43–50, doi:10.1016/j.jhazmat.2018.07.082.
9. Zhang, L.; Wang, Y.; Tan, F.; Yang, Y.; Wu, X.; Wang, W.; Liu, D. Tidal variability of polycyclic aromatic hydrocarbons and organophosphate esters in the coastal seawater of Dalian, China. *Sci Total Environ* **2019**, *134441*, doi:10.1016/j.scitotenv.2019.134441.
10. Zhang, Z.; Lin, G.; Lin, T.; Zhang, R.; Jin, L.; Di, Y. Occurrence, behavior, and fate of organophosphate esters (OPEs) in subtropical paddy field environment: A case study in Nanning City of South China. *Environ Pollut* **2020**, *267*, 115675, doi:10.1016/j.envpol.2020.115675.
11. Zhong, M.; Tang, J.; Guo, X.; Guo, C.; Li, F.; Wu, H. Occurrence and spatial distribution of organophosphorus flame retardants and plasticizers in the Bohai, Yellow and East China seas. *Sci Total Environ* **2020**, *741*, 140434, doi:10.1016/j.scitotenv.2020.140434.
12. Zhang, R.; Yu, K.; Li, A.; Zeng, W.; Lin, T.; Wang, Y. Occurrence, phase distribution, and bioaccumulation of organophosphate esters (OPEs) in mariculture farms of the Beibu Gulf, China: A health risk assessment through seafood consumption. *Environ Pollut* **2020**, *263*, 114426, doi:10.1016/j.envpol.2020.114426.



13. Dong, Z.; Ma, Y.; Li, J.; Yuan, H.; Jin, J.; Wang, Y. Occurrence and Human Exposure Risk Assessment of Organophosphate Esters
14. in Drinking Water in the Weifang Binhai Economic-Technological Development Area. *Environ. Chem.* **2017**, *38*, 4212–4219 (in Chinese).
15. Xu, L.; Hu, Q.; Liu, J.; Liu, S.; Liu, C.; Deng, Q.; Zeng, X.; Yu, Z. Occurrence of organophosphate esters and their diesters degradation products in industrial wastewater treatment plants in China: Implication for the usage and potential degradation during production processing. *Environ Pollut* **2019**, *250*, 559–566, doi:10.1016/j.envpol.2019.04.058.
16. Zhang, W.; Wang, P.; Li, Y.; Wang, D.; Matsiko, J.; Yang, R.; Sun, H.; Hao, Y.; Zhang, Q.; Jiang, G. Spatial and temporal distribution of organophosphate esters in the atmosphere of the Beijing-Tianjin-Hebei region, China. *Environ Pollut* **2019**, *244*, 182–189, doi:10.1016/j.envpol.2018.09.131.
17. Wang, Y.; Zhang, Q.; Song, N.; Zhang, S.; Tao, L.; Zhao, Y.; Han, Z. Pollution characteristics and health risk assessment of organic phosphorus flame retardant in snow water of Nanjing. *China Environmental Science*. **2019**, *39*, 5101–5109 (in Chinese)..
18. Ren, G.; Chu, X.; Zhang, J.; Zheng, K.; Zhou, X.; Zeng, X.; Yu, Z. Organophosphate esters in the water, sediments, surface soils, and tree bark surrounding a manufacturing plant in north China. *Environ Pollut* **2019**, *246*, 374–380, doi:10.1016/j.envpol.2018.12.020.
19. Luo, Q.; Gu, L.; Wu, Z.; Shan, Y.; Wang, H.; Sun, L. Distribution, source apportionment and ecological risks of organophosphate esters in surface sediments from the Liao River, Northeast China. *Chemosphere* **2020**, *250*, 126297, doi:10.1016/j.chemosphere.2020.126297.
20. Cao, D.; Guo, J.; Wang, Y.; Li, Z.; Liang, K.; Corcoran, M.B.; Hosseini, S.; Bonina, S.M.C.; Rockne, K.J.; Sturchio, N.C., et al. Organophosphate Esters in Sediment of the Great Lakes. *Environ Sci Technol* **2017**, *51*, 1441–1449, doi:10.1021/acs.est.6b05484.
21. Zeng, X.; Xu, L.; Hu, Q.; Liu, Y.; Hu, J.; Liao, W.; Yu, Z. Occurrence and distribution of organophosphorus flame retardants/plasticizers in coastal sediments from the Taiwan Strait in China. *Mar Pollut Bull* **2020**, *151*, 110843, doi:10.1016/j.marpolbul.2019.110843.
22. Liao, C.; Kim, U.; Kannan, K. Occurrence and distribution of organophosphate esters in sediment from northern Chinese coastal waters. *Sci Total Environ* **2020**, *704*, 135328, doi:10.1016/j.scitotenv.2019.135328.
23. Zeng, X.; He, L.; Cao, S.; Ma, S.; Yu, Z.; Gui, H.; Sheng, G.; Fu, J. Occurrence and distribution of organophosphate flame retardants/plasticizers in wastewater treatment plant sludges from the Pearl River Delta, China. *Environ Toxicol Chem* **2014**, *33*, 1720–1725, doi:10.1002/etc.2604.
24. Xing, L.; Zhang, Q.; Sun, X.; Zhu, H.; Zhang, S.; Xu, H. Occurrence, distribution and risk assessment of organophosphate esters in surface water and sediment from a shallow freshwater Lake, China. *Sci Total Environ* **2018**, *636*, 632–640, doi:10.1016/j.scitotenv.2018.04.320.
25. Pang, L.; Yang, H.; Wang, Y.; Luo, X.; Liu, S.; Xiao, J. Organophosphate flame retardants in total suspended particulates from an urban area of Zhengzhou, China: Temporal variations, potential affecting factors, and health risk assessment. *Ecotox Environ Safe* **2019**, *176*, 204–210, doi:10.1016/j.ecoenv.2019.03.092.
26. Ren, G.; Chen, Z.; Feng, J.; Ji, W.; Zhang, J.; Zheng, K.; Yu, Z.; Zeng, X. Organophosphate esters in total suspended particulates of an urban city in East China. *Chemosphere* **2016**, *164*, 75–83, doi:10.1016/j.chemosphere.2016.08.090.
27. Chen, Y.; Song, Y.; Chen, Y.; Zhang, Y.; Li, R.; Wang, Y.; Qi, Z.; Chen, Z.; Cai, Z. Contamination profiles and potential health risks of organophosphate flame retardants in PM<sub>2.5</sub> from Guangzhou and Taiyuan, China. *Environ Int* **2020**, *134*, 105343, doi:10.1016/j.envint.2019.105343.
28. Li, J.; Tang, J.; Mi, W.; Tian, C.; Emeis, K.; Ebinghaus, R.; Xie, Z. Spatial Distribution and Seasonal Variation of Organophosphate Esters in Air above the Bohai and Yellow Seas, China. *Environ Sci Technol* **2017**, *52*, 89–97, doi:10.1021/acs.est.7b03807.
29. Lai, S.; Xie, Z.; Song, T.; Tang, J.; Zhang, Y.; Mi, W.; Peng, J.; Zhao, Y.; Zou, S.; Ebinghaus, R. Occurrence and dry deposition of organophosphate esters in atmospheric particles over the northern South China Sea. *Chemosphere* **2015**, *127*, 195–200, doi:10.1016/j.chemosphere.2015.02.015.
30. Cao, D.; Lv, K.; Gao, W.; Fu, J.; Wu, J.; Fu, J.; Wang, Y.; Jiang, G. Presence and human exposure assessment of organophosphate flame retardants (OPEs) in indoor dust and air in Beijing, China. *Ecotox Environ Safe* **2019**, *169*, 383–391, doi:10.1016/j.ecoenv.2018.11.038.
31. Sun, Y.; Guo, J.; Liu, L.; Sverko, E.; Zhang, Z.; Tian, C.; Huo, C.; Li, H.; Ma, W.; Zhang, Z., et al. Seasonal variation and influence factors of organophosphate esters in air particulate matter of a northeastern Chinese test home. *Sci Total Environ* **2020**, *740*, 140048, doi:10.1016/j.scitotenv.2020.140048.
32. Li, W.; Shi, Y.; Gao, L.; Wu, C.; Liu, J.; Cai, Y. Occurrence, distribution and risk of organophosphate esters in urban road dust in Beijing, China. *Environ Pollut* **2018**, *241*, 566–575, doi:10.1016/j.envpol.2018.05.092.
33. Wang, G.; Liu, Y.; Zhao, X.; Tao, W.; Wang, H. Geographical distributions and human exposure of organophosphate esters in college library dust from Chinese cities. *Environ Pollut* **2019**, *255*, 113332, doi:10.1016/j.envpol.2019.113332.
34. Pang, L.; Yang, H.; Pang, R.; Zhou, Y.; Xiao, J.; Wang, Z. Occurrence, distribution, and risk assessment of organophosphate esters in urban street dust in the central province of Henan, China. *Environ Sci Pollut Res Int* **2019**, *26*, 27862–27871, doi:10.1007/s11356-019-06008-x.
35. Chen, Y.; Zhang, Q.; Luo, T.; Xing, L.; Xu, H. Occurrence, distribution and health risk assessment of organophosphate esters in outdoor dust in Nanjing, China: Urban vs. rural areas. *Chemosphere* **2019**, *231*, 41–50, doi:10.1016/j.chemosphere.2019.05.135.
36. He, M.J. Organophosphate Esters in Road Dust from a Suburban Area of Chongqing, China: Characterization of Particle Size Distribution and Human Exposure. *Arch Environ Contam Toxicol* **2019**, *76*, 630–639, doi:10.1007/s00244-019-00612-1.

37. Abafe, O.A.; Martincigh, B.S. Concentrations, sources and human exposure implications of organophosphate esters in indoor dust from South Africa. *Chemosphere* **2019**, *230*, 239–247, doi:10.1016/j.chemosphere.2019.04.175.
38. Sun, Y.; Liu, L.Y.; Sverko, E.; Li, Y.F.; Li, H.L.; Huo, C.Y.; Ma, W.L.; Song, W.W.; Zhang, Z.F. Organophosphate flame retardants in college dormitory dust of northern Chinese cities: Occurrence, human exposure and risk assessment. *Sci Total Environ* **2019**, *665*, 731–738, doi:10.1016/j.scitotenv.2019.02.098.
39. Hu, Q.; Xu, L.; Liu, Y.; Zeng, X.; Yu, Z. Co-occurrence and distribution of organophosphate tri- and di-esters in indoor dust from different indoor environments in Guangzhou and their potential human health risk. *Environ Pollut* **2020**, *262*, 114311, doi:10.1016/j.envpol.2020.114311.
40. Li, W.; Wang, Y.; Kannan, K. Occurrence, distribution and human exposure to 20 organophosphate esters in air, soil, pine needles, river water, and dust samples collected around an airport in New York state, United States. *Environ Int* **2019**, *131*, 105054, doi:10.1016/j.envint.2019.105054.
41. Wang, Y.; Sun, H.; Zhu, H.; Yao, Y.; Chen, H.; Ren, C.; Wu, F.; Kannan, K. Occurrence and distribution of organophosphate flame retardants (OPFRs) in soil and outdoor settled dust from a multi-waste recycling area in China. *Sci Total Environ* **2018**, *625*, 1056–1064, doi:10.1016/j.scitotenv.2018.01.013.
42. He, J.; Li, J.; Ma, L.; Wu, N.; Zhang, Y.; Niu, Z. Large-scale distribution of organophosphate esters (flame retardants and plasticizers) in soil from residential area across China: Implications for current level. *Sci Total Environ* **2019**, *697*, 133997, doi:10.1016/j.scitotenv.2019.133997.
43. Wan, W.; Zhang, S.; Huang, H.; Wu, T. Occurrence and distribution of organophosphorus esters in soils and wheat plants in a plastic waste treatment area in China. *Environ Pollut* **2016**, *214*, 349–353, doi:10.1016/j.envpol.2016.04.038.
44. Wang, Y.; Yao, Y.; Li, W.; Zhu, H.; Wang, L.; Sun, H.; Kannan, K. A nationwide survey of 19 organophosphate esters in soils from China: Spatial distribution and hazard assessment. *Sci Total Environ* **2019**, *671*, 528–535, doi:10.1016/j.scitotenv.2019.03.335.
45. He, M.; Yang, T.; Yang, Z.; Zhou, H.; Wei, S. Current State, Distribution, and Sources of Phthalate Esters and Organophosphate Esters in Soils of the Three Gorges Reservoir Region, China. *Arch Environ Con Tox* **2018**, *74*, 502–513, doi:10.1007/s00244-017-0469-7.
46. Yang, Z.; He, M.; Yang, T.; Lu, J.; Wei, S. Occurrence and Distribution of the Organophosphate Esters in Soils of Mixed-land Use Area in Chongqing City. *Environ. Chem.* **2018**, *39*, 5135–5141 (in Chinese).
47. Cui, K.; Wen, J.; Zeng, Z.; Zeng, F.; Li, S.; Zhou, X. Occurrence and distribution of organophosphate esters in urban soils of the subtropical city, Guangzhou, China. *Chemosphere* **2017**, *175*, 514–520, doi:10.1016/j.chemosphere.2017.02.070.
48. Ma, Y.; Cui, K.; Zeng, F.; Wen, J.; Liu, H.; Zhu, F.; Ouyang, G.; Luan, T.; Zeng, Z. Microwave-assisted extraction combined with gel permeation chromatography and silica gel cleanup followed by gas chromatography-mass spectrometry for the determination of organophosphorus flame retardants and plasticizers in biological samples. *Anal Chim Acta* **2013**, *786*, 47–53, doi:10.1016/j.aca.2013.04.062.
49. Liu, Y.; Tang, B.; Liu, Y.; Luo, X.; Mai, B.; Covaci, A.; Poma, G. Occurrence, biomagnification and maternal transfer of legacy and emerging organophosphorus flame retardants and plasticizers in water snake from an e-waste site. *Environ Int* **2019**, *133*, 105240, doi:10.1016/j.envint.2019.105240.
50. Hou, R.; Liu, C.; Gao, X.; Xu, Y.; Zha, J.; Wang, Z. Accumulation and distribution of organophosphate flame retardants (PFRs) and their di-alkyl phosphates (DAPs) metabolites in different freshwater fish from locations around Beijing, China. *Environ Pollut* **2017**, *229*, 548–556, doi:10.1016/j.envpol.2017.06.097.
